# Supplementary material for: Association of Dietary Nitrate, Nitrite, and N-Nitroso Compounds Intake and Gastrointestinal Cancers: A Systematic Review and Meta-Analysis
Source: MDPI journal article supplement (doi:10.3390/toxics11020190), 2023-02-17
Supplement: s1 [file s1]

**Supplementary Table S1**

| Table S1: Characteristics of cohort studies in the systematic review |                                                            |                |                       |             |                             |                           |                       |                                                                                                                                                                                                                                                                                                                                                  |
|----------------------------------------------------------------------|------------------------------------------------------------|----------------|-----------------------|-------------|-----------------------------|---------------------------|-----------------------|--------------------------------------------------------------------------------------------------------------------------------------------------------------------------------------------------------------------------------------------------------------------------------------------------------------------------------------------------|
| num                                                                  | Firstauthor_Year_<br>Gender_Locatio                        | Cohort<br>size | Numce<br>r of<br>case | Cancer type | Analytical<br>Category      | Consumption<br>Categories | Adjusted RR<br>(95CI) | adjusted                                                                                                                                                                                                                                                                                                                                         |
| 1                                                                    | Arbor J.L. Quis_2018_<br>M/F_USA_Processed meats           | 34550          | 75                    | Pancrease__ | nitrite_<br>mg/day          | 0.01-0.03                 | 0.98(0.72-1.35)       | reference dose <0.010- adjusted: age, smoking ,calories                                                                                                                                                                                                                                                                                          |
|                                                                      |                                                            |                | 72                    |             |                             | 0.04-0.06                 | 1.02(0.73-1.41)       |                                                                                                                                                                                                                                                                                                                                                  |
|                                                                      |                                                            |                | 61                    |             |                             | 0.07-0.18                 | 1.06(0.74-1.51)       |                                                                                                                                                                                                                                                                                                                                                  |
|                                                                      |                                                            |                | 22                    |             |                             | >0.18                     | 1.66(1-2.75)          |                                                                                                                                                                                                                                                                                                                                                  |
|                                                                      | Arbor J.L. Quis_2018_<br>M/F_USA_Animal sources            | 34550          | 71                    |             | nitrite_<br>mg/day          | 0.29-0.40                 | 1.06(0.75-1.50)       | reference dose <0.29 - adjusted: age, smoking ,calories                                                                                                                                                                                                                                                                                          |
|                                                                      |                                                            |                | 77                    |             |                             | 0.41-0.56                 | 1.08(0.74-1.57)       |                                                                                                                                                                                                                                                                                                                                                  |
|                                                                      |                                                            |                | 62                    |             |                             | 0.57-0.84                 | 1.27(0.81-1.99)       |                                                                                                                                                                                                                                                                                                                                                  |
|                                                                      |                                                            |                | 18                    |             |                             | >0.84                     | 1.65(0.84-3.22)       |                                                                                                                                                                                                                                                                                                                                                  |
|                                                                      | Arbor J.L. Quis_2018_<br>M/F_USA_Food                      | 34550          | 67                    |             | nitrite_<br>mg/day          | 0.86-1.11                 | 0.85(0.59-1.22)       | reference dose <0.86 - adjusted: age, smoking ,calories                                                                                                                                                                                                                                                                                          |
|                                                                      |                                                            |                | 70                    |             |                             | 0.12-1.43                 | 0.94(0.62-1.42)       |                                                                                                                                                                                                                                                                                                                                                  |
|                                                                      |                                                            |                | 68                    |             |                             | 1.44-2.05                 | 1.3(0.79-2.14)        |                                                                                                                                                                                                                                                                                                                                                  |
|                                                                      |                                                            |                | 15                    |             |                             | >2.05                     | 1.28(0.59-2.76)       |                                                                                                                                                                                                                                                                                                                                                  |
|                                                                      | Arbor J.L. Quis_2018_<br>M/F_USA_Food                      | 34550          | 80                    |             | nitrate_<br>mg/day          | 16.2-23.9                 | 1.08(0.78-1.48)       | reference dose: <16.2 - adjusted: age, smoking ,calories                                                                                                                                                                                                                                                                                         |
|                                                                      |                                                            |                | 73                    |             |                             | 24-34.2                   | 0.99(0.70-1.39)       |                                                                                                                                                                                                                                                                                                                                                  |
|                                                                      |                                                            |                | 60                    |             |                             | 34.3-58.5                 | 1.05(0.72-1.52)       |                                                                                                                                                                                                                                                                                                                                                  |
|                                                                      |                                                            |                | 17                    |             |                             | >58.5                     | 1.25(0.71-2.21)       |                                                                                                                                                                                                                                                                                                                                                  |
|                                                                      | Arbor J.L. Quis_2018_<br>M/F_USA_Plant sources             | 34550          | 62                    |             | nitrite_<br>mg/day          | 0.51-0.67                 | 0.68(0.48-0.96)       | reference dose <0.51 - adjusted: age, smoking ,calories                                                                                                                                                                                                                                                                                          |
|                                                                      |                                                            |                | 83                    |             |                             | 0.68-0.90                 | 0.89(0.62-1.28)       |                                                                                                                                                                                                                                                                                                                                                  |
|                                                                      |                                                            |                | 59                    |             |                             | 0.91-1.39                 | 0.8(0.52-1.24)        |                                                                                                                                                                                                                                                                                                                                                  |
|                                                                      |                                                            |                | 10                    |             |                             | >1.39                     | 0.55(0.25-1.17)       |                                                                                                                                                                                                                                                                                                                                                  |
|                                                                      | Arbor J.L. Quis_2018_<br>M/F_USA_Water                     | 15862          | 41                    |             | nitrate_<br>mg/l            | 0.47-1.08                 | 1.4(0.88-2.24)        | reference dose<0.47-adj:age,smoking                                                                                                                                                                                                                                                                                                              |
|                                                                      |                                                            |                | 48                    |             |                             | 1.09-2.97                 | 1.51(0.96-2.37)       |                                                                                                                                                                                                                                                                                                                                                  |
|                                                                      |                                                            |                | 25                    |             |                             | 2.98-5.69                 | 1.14(0.67-1.93)       |                                                                                                                                                                                                                                                                                                                                                  |
|                                                                      |                                                            |                | 7                     |             |                             | >797                      | 1.18(0.52-2.67)       |                                                                                                                                                                                                                                                                                                                                                  |
| 2                                                                    | Briseis Aschebrook-<br>Kilfoy_2011_F_USA_Animal<br>sources | 292391         | 131                   | Pancrease__ | nitrite_<br>mg/1000K<br>cal | .15                       | 0.97(0.76-1.23)       | reference= 0.1- adjusted: age (continuous), race (non-Hispanic white, non-Hispanic black, other, or missing), total energy intake (continuous), smoking status, family history of cancer, family history of diabetes, body mass index (weight (kg)/height (m)2; <25, 2529.9, 3034.9, or 35), and intakes of saturated fat, folate, and vitamin C |
|                                                                      |                                                            |                | 134                   |             |                             | .2                        | 1.06(0.83-1.34)       |                                                                                                                                                                                                                                                                                                                                                  |
|                                                                      |                                                            |                | 118                   |             |                             | .25                       | 0.99(0.77-1.27)       |                                                                                                                                                                                                                                                                                                                                                  |
|                                                                      |                                                            |                | 99                    |             |                             | .36                       | 0.94(0.72-1.22)       |                                                                                                                                                                                                                                                                                                                                                  |
|                                                                      | Briseis Aschebrook-<br>Kilfoy_2011_F_USA_Food              | 292391         | 125                   |             | nitrite_<br>mg/1000K<br>cal | .57                       | 0.93(0.72-1.19)       | reference= 0.45- adjusted: age (continuous), race (non-Hispanic white, non-Hispanic black, other, or missing), total energy intake (continuous), smoking status, family history of cancer, family history of diabetes, body mass index (weight (kg)/height                                                                                       |
|                                                                      |                                                            |                | 111                   |             |                             | .65                       | 0.78(0.60-1.02)       |                                                                                                                                                                                                                                                                                                                                                  |
|                                                                      |                                                            |                | 138                   |             |                             | .74                       | 0.92(0.72-1.19)       |                                                                                                                                                                                                                                                                                                                                                  |
|                                                                      |                                                            |                | 127                   |             |                             | .9                        | 0.81(0.61-1.06)       |                                                                                                                                                                                                                                                                                                                                                  |

|                                                       |        |        |     |          |      |                 |                                                                                        |
|-------------------------------------------------------|--------|--------|-----|----------|------|-----------------|----------------------------------------------------------------------------------------|
|                                                       |        | 101    |     |          |      |                 | (m)2; <25, 2529.9, 3034.9, or 35), and intakes of saturated fat, folate, and vitamin C |
|                                                       |        | 128    |     |          |      |                 |                                                                                        |
|                                                       |        | 136    |     |          |      |                 |                                                                                        |
|                                                       |        | 171    |     |          |      |                 |                                                                                        |
| Briseis Aschebrook-Kilfoy_2011_F_USA_Plant sources    | 292391 | 127    |     |          |      |                 |                                                                                        |
|                                                       |        | 116    |     |          |      |                 |                                                                                        |
|                                                       |        | 151    |     |          |      |                 |                                                                                        |
|                                                       |        | 136    |     |          |      |                 |                                                                                        |
| Briseis Aschebrook-Kilfoy_2011_M/F_USA_Animal sources | 293501 | 340    |     |          |      |                 |                                                                                        |
|                                                       |        | 293494 | 363 |          |      |                 |                                                                                        |
|                                                       |        | 293529 | 378 |          |      |                 |                                                                                        |
|                                                       |        | 293516 | 347 |          |      |                 |                                                                                        |
| Briseis Aschebrook-Kilfoy_2011_M/F_USA_Food           | 293522 | 361    |     |          |      |                 |                                                                                        |
|                                                       |        | 293462 | 331 |          |      |                 |                                                                                        |
|                                                       |        | 293499 | 348 |          |      |                 |                                                                                        |
|                                                       |        | 293490 | 321 |          |      |                 |                                                                                        |
| Briseis Aschebrook-Kilfoy_2011_M/F_USA_Plant sources  | 293541 | 380    |     |          |      |                 |                                                                                        |
|                                                       |        | 293446 | 315 |          |      |                 |                                                                                        |
|                                                       |        | 293501 | 350 |          |      |                 |                                                                                        |
|                                                       |        | 293472 | 303 |          |      |                 |                                                                                        |
|                                                       |        |        |     | nitrate_ | 29.9 | 0.89(0.67-1.19) | reference= 19.3- adjusted: age (continuous), race                                      |
|                                                       |        |        |     | mg/1000K | 40.9 | 0.93(0.71-1.23) | (non-Hispanic white, non-Hispanic black, other, or                                     |
|                                                       |        |        |     | cal      | 57.4 | 0.84(0.64-1.11) | missing), total energy intake (continuous), smoking                                    |
|                                                       |        |        |     |          | 94.8 | 0.88(0.66-1.17) | status, family history of cancer, family history of                                    |
|                                                       |        |        |     |          |      |                 | diabetes, body mass index (weight (kg)/height                                          |
|                                                       |        |        |     |          |      |                 | (m)2; <25, 2529.9, 3034.9, or 35), and intakes of                                      |
|                                                       |        |        |     |          |      |                 | saturated fat, folate, and vitamin C                                                   |
|                                                       |        |        |     | nitrite_ | .34  | 1.12(0.86-1.47) | reference= 0.25- adjusted: age (continuous), race                                      |
|                                                       |        |        |     | mg/1000K | .42  | 0.91(0.69-1.21) | (non-Hispanic white, non-Hispanic black, other, or                                     |
|                                                       |        |        |     | cal      | .51  | 1.06(0.80-1.39) | missing), total energy intake (continuous), smoking                                    |
|                                                       |        |        |     |          | .680 | 0.89(0.65-1.20) | status, family history of cancer, family history of                                    |
|                                                       |        |        |     |          |      |                 | diabetes, body mass index (weight (kg)/height                                          |
|                                                       |        |        |     |          |      |                 | (m)2; <25, 2529.9, 3034.9, or 35), and intakes of                                      |
|                                                       |        |        |     |          |      |                 | saturated fat, folate, and vitamin C                                                   |
|                                                       |        |        |     | nitrite_ | .15  | 1.07(0.92-1.25) | reference= 0.1- adjusted: age (continuous), race                                       |
|                                                       |        |        |     | mg/1000K | .2   | 1.11(0.95-1.30) | (non-Hispanic white, non-Hispanic black, other, or                                     |
|                                                       |        |        |     | cal      | .25  | 1.11(0.95-1.30) | missing), total energy intake (continuous), smoking                                    |
|                                                       |        |        |     |          | .36  | 0.96(0.82-1.13) | status, family history of cancer, family history of                                    |
|                                                       |        |        |     |          |      |                 | diabetes, body mass index (weight (kg)/height                                          |
|                                                       |        |        |     |          |      |                 | (m)2; <25, 2529.9, 3034.9, or 35), and intakes of                                      |
|                                                       |        |        |     |          |      |                 | saturated fat, folate, and vitamin C                                                   |
|                                                       |        |        |     | nitrite_ | .57  | 0.99(0.86-1.16) | reference= 0.45- adjusted: age (continuous), race                                      |
|                                                       |        |        |     | mg/1000K | .65  | 0.92(0.79-1.08) | (non-Hispanic white, non-Hispanic black, other, or                                     |
|                                                       |        |        |     | cal      | .74  | 0.97(0.83-1.14) | missing), total energy intake (continuous), smoking                                    |
|                                                       |        |        |     |          | .9   | 0.92(0.78-1.08) | status, family history of cancer, family history of                                    |
|                                                       |        |        |     |          |      |                 | diabetes, body mass index (weight (kg)/height                                          |
|                                                       |        |        |     |          |      |                 | (m)2; <25, 2529.9, 3034.9, or 35), and intakes of                                      |
|                                                       |        |        |     |          |      |                 | saturated fat, folate, and vitamin C                                                   |
|                                                       |        |        |     | nitrate_ | 29.9 | 0.91(0.78-1.06) | reference= 19.3- adjusted: age (continuous), race                                      |
|                                                       |        |        |     | mg/1000K | 40.9 | 1.02(0.88-1.18) | (non-Hispanic white, non-Hispanic black, other, or                                     |
|                                                       |        |        |     | cal      | 57.4 | 0.99(0.85-1.16) | missing), total energy intake (continuous), smoking                                    |
|                                                       |        |        |     |          | 94.8 | 1.01(0.85-1.20) | status, family history of cancer, family history of                                    |
|                                                       |        |        |     |          |      |                 | diabetes, body mass index (weight (kg)/height                                          |
|                                                       |        |        |     |          |      |                 | (m)2; <25, 2529.9, 3034.9, or 35), and intakes of                                      |
|                                                       |        |        |     |          |      |                 | saturated fat, folate, and vitamin C                                                   |
|                                                       |        |        |     | nitrite_ | .34  | 1.02(0.88-1.18) | reference= 0.25- adjusted: age (continuous), race                                      |
|                                                       |        |        |     | mg/1000K | .42  | 0.87(0.74-1.01) | (non-Hispanic white, non-Hispanic black, other, or                                     |
|                                                       |        |        |     | cal      | .51  | 0.99(0.84-1.16) | missing), total energy intake (continuous), smoking                                    |
|                                                       |        |        |     |          | .680 | 0.91(0.76-1.09) | status, family history of cancer, family history of                                    |
|                                                       |        |        |     |          |      |                 | diabetes, body mass index (weight (kg)/height                                          |

|                                                     |        |     |              |                                 |       |                 |                                                                                                                                                                                                                                                                                                                                                   |
|-----------------------------------------------------|--------|-----|--------------|---------------------------------|-------|-----------------|---------------------------------------------------------------------------------------------------------------------------------------------------------------------------------------------------------------------------------------------------------------------------------------------------------------------------------------------------|
| Briseis Aschebrook-Kilfoy_2011_M_USA_Animal sources | 292866 | 209 |              | nitrite_<br>mg/1000K<br>cal     | .15   | 1.16(0.94-1.44) | (m)2; <25, 2529.9, 3034.9, or 35), and intakes of saturated fat, folate, and vitamin C                                                                                                                                                                                                                                                            |
|                                                     |        | 229 |              |                                 | .2    | 1.16(0.94-1.43) | reference= 0.1- adjusted: age (continuous), race (non-Hispanic white, non-Hispanic black, other, or missing), total energy intake (continuous), smoking status, family history of cancer, family history of diabetes, body mass index (weight (kg)/height (m)2; <25, 2529.9, 3034.9, or 35), and intakes of saturated fat, folate, and vitamin C  |
|                                                     |        | 260 |              |                                 | .25   | 1.21(0.98-1.48) |                                                                                                                                                                                                                                                                                                                                                   |
|                                                     |        | 248 |              |                                 | .36   | 0.99(0.80-1.23) |                                                                                                                                                                                                                                                                                                                                                   |
|                                                     |        | 236 |              | nitrite_<br>mg/1000K<br>cal     | .57   | 1.03(0.86-1.24) | reference= 0.45- adjusted: age (continuous), race (non-Hispanic white, non-Hispanic black, other, or missing), total energy intake (continuous), smoking status, family history of cancer, family history of diabetes, body mass index (weight (kg)/height (m)2; <25, 2529.9, 3034.9, or 35), and intakes of saturated fat, folate, and vitamin C |
|                                                     |        | 220 |              |                                 | .65   | 1(0.82-1.21)    |                                                                                                                                                                                                                                                                                                                                                   |
|                                                     |        | 210 |              |                                 | .74   | 0.99(0.81-1.20) |                                                                                                                                                                                                                                                                                                                                                   |
|                                                     |        | 194 |              |                                 | .9    | 0.97(0.79-1.20) |                                                                                                                                                                                                                                                                                                                                                   |
|                                                     | 292866 | 229 |              | nitrate_<br>mg/1000K<br>cal     | 29.9  | 0.91(0.76-1.09) | reference= 19.3- adjusted: age (continuous), race (non-Hispanic white, non-Hispanic black, other, or missing), total energy intake (continuous), smoking status, family history of cancer, family history of diabetes, body mass index (weight (kg)/height (m)2; <25, 2529.9, 3034.9, or 35), and intakes of saturated fat, folate, and vitamin C |
|                                                     |        | 232 |              |                                 | 40.9  | 1.05(0.88-1.25) |                                                                                                                                                                                                                                                                                                                                                   |
|                                                     |        | 204 |              |                                 | 57.4  | 1.07(0.89-1.30) |                                                                                                                                                                                                                                                                                                                                                   |
|                                                     |        | 151 |              |                                 | 94.8  | 1.07(0.86-1.33) |                                                                                                                                                                                                                                                                                                                                                   |
| Briseis Aschebrook-Kilfoy_2011_M_USA_Plant sources  | 292866 | 253 |              | nitrite_<br>mg/1000K<br>cal     | .34   | 0.98(0.82-1.16) | reference= 0.25- adjusted: age (continuous), race (non-Hispanic white, non-Hispanic black, other, or missing), total energy intake (continuous), smoking status, family history of cancer, family history of diabetes, body mass index (weight (kg)/height (m)2; <25, 2529.9, 3034.9, or 35), and intakes of saturated fat, folate, and vitamin C |
|                                                     |        | 199 |              |                                 | .42   | 0.85(0.70-1.03) |                                                                                                                                                                                                                                                                                                                                                   |
|                                                     |        | 199 |              |                                 | .51   | 0.95(0.78-1.17) |                                                                                                                                                                                                                                                                                                                                                   |
|                                                     |        | 167 |              |                                 | .680  | 0.94(0.75-1.18) |                                                                                                                                                                                                                                                                                                                                                   |
| 3<br>Cross, A. J._2010_M/F_USA_Animal sources       | 300948 | 488 | Colorectal__ | nitrite_<br>microg/10<br>00kcal | 34.6  | 0.99(0.87-1.12) | reference dose:12.1- adjusted: gender, education, BMI, smoking, total energy, fiber, calcium                                                                                                                                                                                                                                                      |
|                                                     |        | 554 |              |                                 | 61.4  | 1.07(0.94-1.21) |                                                                                                                                                                                                                                                                                                                                                   |
|                                                     |        | 603 |              |                                 | 102.9 | 1.12(0.98-1.27) |                                                                                                                                                                                                                                                                                                                                                   |
|                                                     |        | 617 |              |                                 | 199.2 | 1.11(0.97-1.25) |                                                                                                                                                                                                                                                                                                                                                   |
|                                                     |        | 470 |              | nitrate_<br>microg/10<br>00kcal | 66.90 | 0.96(0.85-1.10) | reference dose:24.2- adjusted: gender, education, BMI, smoking, total energy, fiber, calcium,                                                                                                                                                                                                                                                     |
|                                                     |        | 530 |              |                                 | 112.7 | 1.04(0.91-1.18) |                                                                                                                                                                                                                                                                                                                                                   |
|                                                     | 298953 | 609 | Rectum__     | nitrite_<br>microg/10<br>00kcal | 174.5 | 1.13(1.00-1.29) |                                                                                                                                                                                                                                                                                                                                                   |
|                                                     |        | 659 |              |                                 | 298   | 1.16(1.02-1.32) |                                                                                                                                                                                                                                                                                                                                                   |
|                                                     |        | 129 |              | nitrite_<br>microg/10<br>00kcal | 34.6  | 1.07(0.83-1.38) | reference dose:12.1- adjusted: gender, education, BMI, smoking, total energy, fiber, calcium                                                                                                                                                                                                                                                      |
|                                                     |        | 157 |              |                                 | 61.4  | 1.23(0.96-1.58) |                                                                                                                                                                                                                                                                                                                                                   |
|                                                     |        | 162 |              |                                 | 102.9 | 1.21(0.94-1.55) |                                                                                                                                                                                                                                                                                                                                                   |
|                                                     |        | 163 |              |                                 | 199.2 | 1.16(0.90-1.50) |                                                                                                                                                                                                                                                                                                                                                   |

|   |                                               |        |                                           |     |                                  |        |                 |                                                                                                  |
|---|-----------------------------------------------|--------|-------------------------------------------|-----|----------------------------------|--------|-----------------|--------------------------------------------------------------------------------------------------|
| 4 | Cross, A. J. _2011_<br>M/F_USA_Animal sources | 300224 | Colon__                                   | 126 | nitrate_<br>microg/10<br>00kcal  | 66.900 | 1.08(0.83-1.40) | reference dose:24.2- adjusted: gender, education,<br>BMI, smoking, total energy, fiber, calcium, |
|   |                                               |        |                                           | 144 |                                  | 112.7  | 1.18(0.91-1.52) |                                                                                                  |
|   |                                               |        |                                           | 170 |                                  | 174.5  | 1.31(1.01-1.68) |                                                                                                  |
|   |                                               |        |                                           | 174 |                                  | 298    | 1.26(0.97-1.63) |                                                                                                  |
|   |                                               |        |                                           | 359 | nitrite_<br>microg/10<br>00kcal  | 34.6   | 0.96(0.83-1.12) | reference dose:12.1- adjusted: gender, education,<br>BMI, smoking, total energy, fiber, calcium  |
|   |                                               |        |                                           | 397 |                                  | 61.4   | 1.01(0.88-1.18) |                                                                                                  |
|   |                                               |        |                                           | 441 |                                  | 102.9  | 1.09(0.94-1.26) |                                                                                                  |
|   |                                               |        |                                           | 454 |                                  | 199.2  | 1.09(0.94-1.26) |                                                                                                  |
|   |                                               |        |                                           | 344 | nitrate_<br>microg/10<br>00kcal  | 66.900 | 0.93(0.80-1.08) | reference dose:24.2- adjusted: gender, education,<br>BMI, smoking, total energy, fiber, calcium, |
|   |                                               |        |                                           | 386 |                                  | 112.7  | 0.99(0.86-1.16) |                                                                                                  |
|   |                                               |        |                                           | 439 |                                  | 174.5  | 1.08(0.93-1.25) |                                                                                                  |
|   |                                               |        |                                           | 485 |                                  | 298    | 1.13(0.97-1.32) |                                                                                                  |
|   |                                               | 337451 | Esophagus_Ad<br>enocarcinoma              | 61  | nitrate_<br>microg/10<br>00kcal  | 66.90  | 0.97(0.66-1.43) | reference dose:24.2                                                                              |
|   |                                               |        |                                           | 68  |                                  | 112.7  | 0.91(0.62-1.35) |                                                                                                  |
|   |                                               |        |                                           | 89  |                                  | 174.5  | 1.01(0.70-1.47) |                                                                                                  |
|   |                                               |        |                                           | 112 |                                  | 298    | 1.1(0.75-1.60)  |                                                                                                  |
|   |                                               |        |                                           | 60  | nitrite_<br>microg/10<br>00kcal  | 34.6   | 0.89(0.61-1.30) | reference dose:12.1                                                                              |
|   |                                               |        |                                           | 66  |                                  | 61.4   | 0.82(0.56-1.20) |                                                                                                  |
|   |                                               |        |                                           | 81  |                                  | 102.9  | 0.88(0.61-1.27) |                                                                                                  |
|   |                                               |        |                                           | 120 |                                  | 199.2  | 1.19(0.84-1.68) |                                                                                                  |
|   |                                               | 337202 | Esophagus__<br>Squamous cell<br>carcinoma | 25  | nitrate_mi<br>crog/1000<br>kcal  | 66.90  | 1.06(0.59-1.91) | reference dose:24.2                                                                              |
|   |                                               |        |                                           | 15  |                                  | 112.7  | 0.6(0.30-1.18)  |                                                                                                  |
|   |                                               |        |                                           | 25  |                                  | 174.5  | 0.9(0.49-1.67)  |                                                                                                  |
|   |                                               |        |                                           | 41  |                                  | 298    | 1.3(0.72-2.35)  |                                                                                                  |
|   |                                               |        |                                           | 30  | nitrite_mic<br>rog/1000k<br>cals | 34.6   | 1.36(0.76-2.43) | reference dose:12.1                                                                              |
|   |                                               |        |                                           | 19  |                                  | 61.4   | 0.82(0.43-1.57) |                                                                                                  |
|   |                                               |        |                                           | 28  |                                  | 102.9  | 1.15(0.63-2.11) |                                                                                                  |
|   |                                               |        |                                           | 31  |                                  | 199.2  | 1.21(0.67-2.20) |                                                                                                  |
|   |                                               | 337351 | Stomach_<br>Noncardia _                   | 44  | nitrite_mic<br>rog/1000k<br>cals | 34.6   | 0.77(0.51-1.15) | reference dose:12.1                                                                              |
|   |                                               |        |                                           | 48  |                                  | 61.4   | 0.79(0.53-1.18) |                                                                                                  |
|   |                                               |        |                                           | 67  |                                  | 102.9  | 1.04(0.71-1.52) |                                                                                                  |
|   |                                               |        |                                           | 64  |                                  | 199.2  | 0.93(0.63-1.37) |                                                                                                  |
|   |                                               |        |                                           | 48  | nitrate_mi<br>crog/1000<br>kcal  | 66.0   | 0.9(0.60-1.35)  | reference dose:24.2                                                                              |
|   |                                               |        |                                           | 50  |                                  | 112.7  | 0.89(0.59-1.33) |                                                                                                  |
|   |                                               |        |                                           | 56  |                                  | 174.5  | 0.91(0.61-1.37) |                                                                                                  |
|   |                                               |        |                                           | 73  |                                  | 298    | 1.04(0.69-1.55) |                                                                                                  |
|   |                                               | 337329 | Stomach_<br>Cardia<br>_Adenocarcin<br>oma | 40  | nitrite_mic<br>rog/1000k<br>cals | 34.6   | 0.72(0.47-1.11) | reference dose:12.1                                                                              |
|   |                                               |        |                                           | 55  |                                  | 61.4   | 0.88(0.58-1.32) |                                                                                                  |
|   |                                               |        |                                           | 61  |                                  | 102.9  | 0.87(0.58-1.31) |                                                                                                  |
|   |                                               |        |                                           | 55  |                                  | 199.2  | 0.71(0.47-1.08) |                                                                                                  |

|   |                                                |                                      |              |                                 |              |                 |                 |                                                                                                                    |                                                                                                                    |
|---|------------------------------------------------|--------------------------------------|--------------|---------------------------------|--------------|-----------------|-----------------|--------------------------------------------------------------------------------------------------------------------|--------------------------------------------------------------------------------------------------------------------|
| 5 |                                                |                                      |              | nitrate_mi<br>crog/1000<br>kcal | 57           | 66.90           | 1.17(0.77-1.77) | reference dose:24.2                                                                                                |                                                                                                                    |
|   |                                                |                                      |              |                                 | 36           | 112.7           | 0.64(0.40-1.02) |                                                                                                                    |                                                                                                                    |
|   |                                                |                                      |              |                                 | 61           | 174.5           | 0.94(0.61-1.45) |                                                                                                                    |                                                                                                                    |
|   |                                                |                                      |              |                                 | 62           | 298             | 0.81(0.52-1.25) |                                                                                                                    |                                                                                                                    |
|   | DellaValle, Curt<br>T_2014_M/F__Animal sources | 73118                                | Colorectal__ | nitrite_mg<br>/day              | 121          | .08             | 0.96(0.75-1.23) | reference dose:0.05- adjusted: age, energy intake,<br>education, physical activity, vitamin C, carotene<br>,folate |                                                                                                                    |
|   |                                                |                                      |              |                                 | 121          | .11             | 1.06(0.82-1.35) |                                                                                                                    |                                                                                                                    |
|   |                                                |                                      |              |                                 | 107          | .14             | 0.97(0.75-1.26) |                                                                                                                    |                                                                                                                    |
|   |                                                |                                      |              |                                 | 119          | .19             | 1.17(0.90-1.51) |                                                                                                                    |                                                                                                                    |
|   |                                                | 72882                                | Colon__      |                                 | 74           | .08             | 0.99(0.72-1.35) |                                                                                                                    |                                                                                                                    |
|   |                                                |                                      |              |                                 | 78           | .11             | 1.14(0.83-1.56) |                                                                                                                    |                                                                                                                    |
|   |                                                |                                      |              |                                 | 72           | .14             | 1.09(0.79-1.51) |                                                                                                                    |                                                                                                                    |
|   |                                                |                                      |              |                                 | 69           | .19             | 1.14(0.81-1.59) |                                                                                                                    |                                                                                                                    |
|   |                                                | 72735                                | Rectum__     |                                 | 47           | .08             | 0.92(0.63-1.36) |                                                                                                                    |                                                                                                                    |
|   |                                                |                                      |              |                                 | 43           | .11             | 0.93(0.62-1.39) |                                                                                                                    |                                                                                                                    |
|   |                                                |                                      |              |                                 | 35           | .14             | 0.79(0.51-1.23) |                                                                                                                    |                                                                                                                    |
|   |                                                |                                      |              |                                 | 50           | .19             | 1.21(0.81-1.82) |                                                                                                                    |                                                                                                                    |
|   |                                                | 73118                                | Colorectal__ |                                 | 142          | .85             | 1.31(1.03-1.66) | reference dose:0.51- adjusted: age, energy intake,<br>education, physical activity, vitamin C, carotene,<br>folate |                                                                                                                    |
|   |                                                |                                      |              |                                 | 113          | 1.13            | 1.12(0.87-1.45) |                                                                                                                    |                                                                                                                    |
|   |                                                |                                      |              |                                 | 124          | 1.45            | 1.28(0.99-1.66) |                                                                                                                    |                                                                                                                    |
|   |                                                |                                      |              |                                 | 110          | 2.06            | 1.15(0.88-1.50) |                                                                                                                    |                                                                                                                    |
|   |                                                | 72882                                | Colon__      |                                 | 86           | .85             | 1.34(0.98-1.82) |                                                                                                                    |                                                                                                                    |
|   |                                                |                                      |              |                                 | 72           | 1.13            | 1.21(0.87-1.68) |                                                                                                                    |                                                                                                                    |
|   |                                                |                                      |              |                                 | 79           | 1.45            | 1.38(1-1.91)    |                                                                                                                    |                                                                                                                    |
|   |                                                |                                      |              |                                 | 69           | 2.06            | 1.22(0.87-1.72) |                                                                                                                    |                                                                                                                    |
|   |                                                | 72735                                | Rectum__     |                                 | 56           | .85             | 1.26(0.86-1.85) |                                                                                                                    |                                                                                                                    |
|   |                                                |                                      |              |                                 | 41           | 1.13            | 1(0.66-1.52)    |                                                                                                                    |                                                                                                                    |
|   |                                                |                                      |              |                                 | 45           | 1.45            | 1.14(0.76-1.73) |                                                                                                                    |                                                                                                                    |
|   |                                                |                                      |              |                                 | 41           | 2.06            | 1.05(0.68-1.61) |                                                                                                                    |                                                                                                                    |
|   |                                                | DellaValle, Curt<br>T_2014_M/F__Food | 73118        |                                 | Colorectal__ | 126             | .74             | 1.09(0.85-1.40)                                                                                                    | reference dose:0.56- adjusted: age, energy intake,<br>education, physical activity, vitamin C, carotene,<br>folate |
|   |                                                |                                      |              |                                 |              | 123             | .87             | 1.1(0.85-1.43)                                                                                                     |                                                                                                                    |
|   |                                                |                                      |              |                                 |              | 122             | 1.01            | 1.1(0.84-1.44)                                                                                                     |                                                                                                                    |
|   |                                                |                                      |              |                                 |              | 119             | 1.23            | 1.05(0.77-1.42)                                                                                                    |                                                                                                                    |
|   | 72882                                          |                                      | Colon__      | 81                              | .74          | 1.27(0.92-1.76) |                 |                                                                                                                    |                                                                                                                    |
|   |                                                |                                      |              | 75                              | .87          | 1.23(0.88-1.73) |                 |                                                                                                                    |                                                                                                                    |
|   |                                                |                                      |              | 80                              | 1.01         | 1.34(0.94-1.90) |                 |                                                                                                                    |                                                                                                                    |
|   |                                                |                                      |              | 75                              | 1.23         | 1.26(0.85-1.86) |                 |                                                                                                                    |                                                                                                                    |
|   | 72735                                          |                                      | Rectum__     | 45                              | .74          | 0.87(0.58-1.29) |                 |                                                                                                                    |                                                                                                                    |
|   |                                                |                                      |              | 48                              | .87          | 0.94(0.63-1.42) |                 |                                                                                                                    |                                                                                                                    |
|   |                                                |                                      |              | 42                              | 1.01         | 0.81(0.52-1.25) |                 |                                                                                                                    |                                                                                                                    |
|   |                                                |                                      |              | 44                              | 1.23         | 0.8(0.49-1.29)  |                 |                                                                                                                    |                                                                                                                    |

|                                               |                                               |                                               |       |              |                    |                 |                 |                                                                                                                    |                                                         |                                                                                                                    |
|-----------------------------------------------|-----------------------------------------------|-----------------------------------------------|-------|--------------|--------------------|-----------------|-----------------|--------------------------------------------------------------------------------------------------------------------|---------------------------------------------------------|--------------------------------------------------------------------------------------------------------------------|
| 6                                             | DellaValle, Curt<br>T_2014_M/F__Plant sources | 73118                                         | 109   | Colorectal__ | nitrate_<br>mg/day | 144.1           | 0.9(0.69-1.17)  | reference dose:98.7- adjusted: age, energy intake,<br>education, physical activity, vitamin C, carotene,<br>folate |                                                         |                                                                                                                    |
|                                               |                                               |                                               | 106   |              |                    | 182.4           | 0.88(0.66-1.16) |                                                                                                                    |                                                         |                                                                                                                    |
|                                               |                                               |                                               | 138   |              |                    | 229             | 1.14(0.85-1.54) |                                                                                                                    |                                                         |                                                                                                                    |
|                                               |                                               |                                               | 137   |              |                    | 313.2           | 1.08(0.73-1.59) |                                                                                                                    |                                                         |                                                                                                                    |
|                                               |                                               | 72882                                         | 70    | 144.1        |                    | 0.9(0.65-1.25)  |                 |                                                                                                                    |                                                         |                                                                                                                    |
|                                               |                                               |                                               | 65    | 182.4        |                    | 0.84(0.59-1.20) |                 |                                                                                                                    |                                                         |                                                                                                                    |
|                                               |                                               |                                               | 87    | 229          |                    | 1.13(0.77-1.66) |                 |                                                                                                                    |                                                         |                                                                                                                    |
|                                               |                                               |                                               | 78    | 313.2        |                    | 0.98(0.59-1.63) |                 |                                                                                                                    |                                                         |                                                                                                                    |
|                                               |                                               | 72735                                         | 39    | 144.1        |                    | 0.9(0.58-1.40)  |                 |                                                                                                                    |                                                         |                                                                                                                    |
|                                               |                                               |                                               | 41    | 182.4        |                    | 0.95(0.60-1.50) |                 |                                                                                                                    |                                                         |                                                                                                                    |
|                                               |                                               |                                               | 51    | 229          |                    | 1.17(0.72-1.90) |                 |                                                                                                                    |                                                         |                                                                                                                    |
|                                               |                                               |                                               | 59    | 313.2        |                    | 1.26(0.69-2.32) |                 |                                                                                                                    |                                                         |                                                                                                                    |
|                                               |                                               | DellaValle, Curt<br>T_2014_M/F__Plant sources | 73118 | 130          |                    | Colorectal__    | .63             |                                                                                                                    | 1.17(0.91-1.50)                                         | reference dose:0.47- adjusted: age, energy intake,<br>education, physical activity, vitamin C, carotene<br>,folate |
|                                               |                                               |                                               |       | 133          |                    |                 | .75             |                                                                                                                    | 1.22(0.94-1.58)                                         |                                                                                                                    |
|                                               |                                               |                                               |       | 117          |                    |                 | .89             |                                                                                                                    | 1.06(0.80-1.40)                                         |                                                                                                                    |
|                                               |                                               |                                               |       | 119          |                    |                 | 1.11            |                                                                                                                    | 1.03(0.76-1.39)                                         |                                                                                                                    |
|                                               | 72882                                         |                                               | 82    | Colon__      | .63                | 1.38(0.99-1.93) |                 |                                                                                                                    |                                                         |                                                                                                                    |
|                                               |                                               |                                               | 82    |              | .75                | 1.43(1.02-2.02) |                 |                                                                                                                    |                                                         |                                                                                                                    |
|                                               |                                               |                                               | 76    |              | .89                | 1.34(0.93-1.91) |                 |                                                                                                                    |                                                         |                                                                                                                    |
|                                               |                                               |                                               | 78    |              | 1.11               | 1.36(0.92-2.01) |                 |                                                                                                                    |                                                         |                                                                                                                    |
|                                               | 72735                                         |                                               | 48    | Rectum__     | .63                | 0.91(0.62-1.35) |                 |                                                                                                                    |                                                         |                                                                                                                    |
|                                               |                                               |                                               | 51    |              | .75                | 0.97(0.65-1.45) |                 |                                                                                                                    |                                                         |                                                                                                                    |
|                                               |                                               |                                               | 41    |              | .89                | 0.75(0.48-1.16) |                 |                                                                                                                    |                                                         |                                                                                                                    |
|                                               |                                               |                                               | 41    |              | 1.11               | 0.67(0.41-1.09) |                 |                                                                                                                    |                                                         |                                                                                                                    |
|                                               | Jones, R.R. _2019_<br>M/F_USA_Processed meats |                                               | 73118 | 110          | Colorectal__       | 142.8           | 0.92(0.70-1.19) | reference dose=0- adjusted: age, heme iron, red<br>meat                                                            |                                                         |                                                                                                                    |
|                                               |                                               |                                               |       | 106          |                    | 181.1           | 0.88(0.67-1.17) |                                                                                                                    |                                                         |                                                                                                                    |
|                                               |                                               |                                               |       | 137          |                    | 227.8           | 1.15(0.85-1.55) |                                                                                                                    |                                                         |                                                                                                                    |
|                                               |                                               |                                               |       | 138          |                    | 311.9           | 1.1(0.75-1.63)  |                                                                                                                    |                                                         |                                                                                                                    |
|                                               |                                               | 72882                                         | 70    | Colon__      | 142.8              | 0.9(0.65-1.26)  |                 |                                                                                                                    |                                                         |                                                                                                                    |
|                                               |                                               |                                               | 64    |              | 181.1              | 0.83(0.58-1.19) |                 |                                                                                                                    |                                                         |                                                                                                                    |
|                                               |                                               |                                               | 87    |              | 227.8              | 1.15(0.78-1.68) |                 |                                                                                                                    |                                                         |                                                                                                                    |
|                                               |                                               |                                               | 79    |              | 311.9              | 1.01(0.61-1.68) |                 |                                                                                                                    |                                                         |                                                                                                                    |
|                                               |                                               | 72735                                         | 40    | Rectum__     | 142.8              | 0.94(0.61-1.46) |                 |                                                                                                                    |                                                         |                                                                                                                    |
|                                               |                                               |                                               | 42    |              | 181.1              | 0.99(0.63-1.56) |                 |                                                                                                                    |                                                         |                                                                                                                    |
|                                               |                                               |                                               | 50    |              | 227.8              | 1.17(0.72-1.90) |                 |                                                                                                                    |                                                         |                                                                                                                    |
|                                               |                                               |                                               | 59    |              | 311.9              | 1.28(0.70-2.36) |                 |                                                                                                                    |                                                         |                                                                                                                    |
| Jones, R.R. _2019_<br>M/F_USA_Processed meats |                                               | 36032                                         | 351   | Colon__      | nitrite_<br>mg/day | <=0.02          | 0.97(0.82-1.15) |                                                                                                                    | reference dose=0- adjusted: age, heme iron, red<br>meat |                                                                                                                    |
|                                               |                                               |                                               | 392   |              | 0.02-0.04          | 1.11(0.94-1.31) |                 |                                                                                                                    |                                                         |                                                                                                                    |
|                                               |                                               |                                               | 361   |              | >0.04              | 1.03(0.86-1.22) |                 |                                                                                                                    |                                                         |                                                                                                                    |
|                                               |                                               | 35033                                         | 86    | Rectum__     |                    | <=0.02          | 0.88(0.63-1.23) |                                                                                                                    | reference dose=0- adjusted: age                         |                                                                                                                    |

|                                              |                        |      |          |                    |             |                 |                                                             |
|----------------------------------------------|------------------------|------|----------|--------------------|-------------|-----------------|-------------------------------------------------------------|
| Jones, R.R. _2019_<br>M/F_USA_Animal sources | 36032                  | 99   | Colon__  |                    | 0.02-0.04   | 1.03(0.74-1.43) | reference dose <=0.19 - adjusted: age, heme iron, red meat  |
|                                              |                        | 82   |          |                    | >0.04       | 0.84(0.59-1.19) |                                                             |
|                                              |                        | 326  |          |                    | 0.20-0.24   | 0.92(0.79-1.08) |                                                             |
|                                              |                        | 345  |          |                    | 0.25-0.30   | 0.94(0.80-1.09) |                                                             |
|                                              |                        | 292  |          |                    | >0.30       | 0.82(0.70-0.97) |                                                             |
|                                              | 35033                  | 97   | Rectum__ |                    | 0.20-0.24   | 1.26(0.94-1.69) | reference dose <=0.19 - adjusted: age                       |
|                                              |                        | 80   |          |                    | 0.25-0.30   | 1.02(0.75-1.38) |                                                             |
|                                              |                        | 66   |          |                    | >0.30       | 0.89(0.64-1.23) |                                                             |
| Jones, R.R. _2019_<br>M/F_USA_Food           | 36032                  | 324  | Colon__  | nitrate_<br>mg/day | 9.81-13.80  | 0.98(0.84-1.15) | reference dose: <=9.80 - adjusted: age, heme iron, red meat |
|                                              |                        | 321  |          |                    | 13.81-19.29 | 0.97(0.83-1.13) |                                                             |
|                                              |                        | 355  |          |                    | >19.29      | 1.11(0.94-1.30) |                                                             |
|                                              |                        | 342  |          | nitrite_<br>mg/day | 0.58-0.65   | 0.93(0.80-1.08) | reference dose<=0.57- adjusted: age, heme iron, red meat    |
|                                              |                        | 320  |          |                    | 0.66-0.74   | 0.83(0.71-0.97) |                                                             |
|                                              | 35033                  | 317  | Rectum__ | nitrate_<br>mg/day | >0.74       | 0.87(0.74-1.02) | reference dose: <=9.80- adjusted: age                       |
|                                              |                        | 81   |          |                    | 9.81-13.80  | 1.03(0.76-1.41) |                                                             |
|                                              |                        | 71   |          |                    | 13.81-19.29 | 0.91(0.66-1.26) |                                                             |
|                                              |                        | 94   |          | nitrite_<br>mg/day | >19.29      | 1.27(0.93-1.74) | reference dose<=0.57- adjusted: age                         |
|                                              |                        | 74   |          |                    | 0.58-0.65   | 0.75(0.55-1.02) |                                                             |
| Jones, R.R. _2019_<br>M/F_USA_Plant sources  | 36032                  | 91   | Colon__  | nitrite_<br>mg/day | 0.66-0.74   | 0.88(0.65-1.18) | reference dose<=0.32- adjusted: age, heme iron, red meat    |
|                                              |                        | 67   |          |                    | >0.74       | 0.68(0.49-0.94) |                                                             |
|                                              |                        | 368  |          |                    | 0.33-0.39   | 0.97(0.83-1.13) |                                                             |
|                                              | 35033                  | 308  | Rectum__ | nitrite_<br>mg/day | 0.40-0.48   | 0.99(0.85-1.18) | reference dose<=0.32- adjusted: age                         |
|                                              |                        | 339  |          |                    | >0.48       | 0.96(0.81-1.14) |                                                             |
|                                              |                        | 102  |          |                    | 0.33-0.39   | 1.12(0.83-1.52) |                                                             |
| Jones, R.R. _2019_<br>M/F_USA_Water          | 12893                  | 75   | Colon__  |                    | 0.40-0.48   | 1(0.72-1.39)    | reference dose<=0.36                                        |
|                                              |                        | 75   |          |                    | >0.48       | 0.86(0.61-1.21) |                                                             |
|                                              |                        | 126  |          |                    | 0.37-0.80   | 1.13(0.88-1.45) |                                                             |
|                                              |                        | 146  |          |                    | 0.81-1.35   | 1.32(1.03-1.69) |                                                             |
|                                              | 12436                  | 116  | Rectum__ | nitrate_<br>mg/l   | 1.36-3.51   | 0.98(0.76-1.27) | reference dose<=0.36                                        |
|                                              |                        | 106  |          |                    | >3.51       | 0.97(0.75-1.26) |                                                             |
|                                              |                        | 18   |          |                    | 0.37-0.80   | 0.48(0.28-0.84) |                                                             |
|                                              |                        | 35   |          |                    | 0.81-1.35   | 0.86(0.53-1.38) |                                                             |
|                                              | 13526                  | 39   | Colon__  |                    | 1.36-3.51   | 0.94(0.60-1.48) | reference dose:0 years                                      |
|                                              |                        | 24   |          |                    | >3.51       | 0.93(0.38-1.07) |                                                             |
|                                              |                        | 96   |          |                    | >5          | 0.91(0.73-1.13) |                                                             |
|                                              |                        | 69   |          |                    | >5          | 0.82(0.63-1.06) |                                                             |
|                                              | 13654                  | 19   | Rectum__ |                    | >5          | 0.86(0.53-1.41) |                                                             |
|                                              |                        | 25   |          |                    | >5          | 0.97(0.63-1.50) |                                                             |
| 7                                            | Keszei, András P_2012_ | 1857 | 12       | Esophagus_         | nitrite_    | .08             | 0.92(0.39-2.16)                                             |

|                             |      |                                        |           |       |                 |                                                                                                                                                        |
|-----------------------------|------|----------------------------------------|-----------|-------|-----------------|--------------------------------------------------------------------------------------------------------------------------------------------------------|
| F_Netherland_Animal sources | 7    | _Adenocarcinoma                        | mg/day    | .2    | 0.61(0.25-1.53) | reference dose=0.02- adjusted: age, smoking, total intake energy, BMI, alcohol, vegetable intake, fruit intake, level of education, physical activity, |
| Keszei, András P_2012_      | 10   |                                        | NDMA_     | .04   | 0.79(0.32-1.91) | reference dose<=0.03- adjusted: age, smoking,                                                                                                          |
| F_Netherland_Food           | 1938 |                                        | micro/day | .07   | 0.92(0.40-2.14) | total intake energy, BMI, alcohol, vegetable intake, fruit intake, level of education, physical activity,                                              |
|                             | 4    |                                        | nitrate_  | 142.7 | 0.26(0.05-1.37) | reference dose=66.4- adjusted: age, smoking, total                                                                                                     |
|                             | 1855 |                                        | mg/day    | 98.5  | 0.9(0.35-2.28)  | intake energy, BMI, alcohol, vegetable intake, fruit intake, level of education, physical activity,                                                    |
| Keszei, András P_2012_      | 38   |                                        | nitrite_  | .12   | 0.86(0.53-1.39) | reference dose :0.02 - adjusted: age, smoking, total                                                                                                   |
| M_Netherland_Animal sources | 1735 |                                        | mg/day    | .28   | 0.74(0.43-1.28) | intake energy, BMI, alcohol, vegetable intake ,fruit intake, level of education, physical activity,                                                    |
|                             | 39   |                                        | NDMA_     | .04   | 0.93(0.57-1.50) | reference dose<=0.03-adj:age, smoking, total                                                                                                           |
|                             | 1754 |                                        | micro/day | .07   | 0.87(0.52-1.45) | intake energy, BMI, alcohol, vegetable intake, fruit intake, level of education, physical activity,                                                    |
| Keszei, András P_2012_      | 39   |                                        | nitrate_  | 142.7 | 0.94(0.50-1.77) | reference dose=66.4-adj:age, smoking, total intake                                                                                                     |
| M_Netherland_Food           | 1736 |                                        | mg/day    | 98.5  | 0.95(0.58-1.55) | energy, BMI, alcohol, vegetable intake, fruit intake, level of education, physical activity,                                                           |
| Keszei, András P_2012_      | 18   |                                        | nitrite_  | .08   | 0.99(0.48-2.03) | reference dose :0.02- adjusted: age, smoking, total                                                                                                    |
| F_Netherland_Animal sources | 1874 |                                        | mg/day    | .2    | 0.85(0.39-1.88) | intake energy, BMI, alcohol, vegetable intake, fruit intake, level of education, physical activity,                                                    |
|                             | 14   |                                        | NDMA_     | .04   | 0.92(0.43-1.97) | reference dose<=0.03- adjusted: age, smoking,                                                                                                          |
|                             | 1954 |                                        | micro/day | .07   | 1.21(0.56-2.62) | total intake energy, BMI, alcohol, vegetable intake ,fruit intake, level of education, physical activity,                                              |
| Keszei, András P_2012_      | 15   |                                        | nitrate_  | 142.7 | 0.75(0.23-2.40) | reference dose=66.4- adjusted: age, smoking, total                                                                                                     |
| F_Netherland_Food           | 1872 |                                        | mg/day    | 98.5  | 1.17(0.55-2.47) | intake energy, BMI, alcohol, vegetable intake, fruit intake, level of education, physical activity,                                                    |
|                             | 18   | Esophagus__<br>Squamous cell carcinoma | nitrite_  | .12   | 1.27(0.62-2.62) | reference dose: 0.03 - adjusted: age, smoking ,total                                                                                                   |
| Keszei, András P_2012_      | 19   |                                        | mg/day    | .28   | 1.92(0.94-3.89) | intake energy, BMI, alcohol, vegetable intake, fruit intake, level of education, physical activity,                                                    |
| M_Netherland_Animal sources | 1680 |                                        | NDMA_     | .08   | 1.21(0.54-2.74) | reference dose<=0.04- adjusted: age, smoking,                                                                                                          |
|                             | 15   |                                        | micro/day | .25   | 2.43(1.13-5.23) | total intake energy, BMI, alcohol, vegetable intake, fruit intake, level of education, physical activity,                                              |
| Keszei, András P_2012_      | 1697 |                                        | nitrate_  | 100.8 | 1.5(0.72-3.12)  | reference dose=68.1- adjusted: age, smoking, total                                                                                                     |
| M_Netherland_Food           | 1681 |                                        | mg/day    | 146.2 | 1.51(0.49-4.62) | intake energy, BMI, alcohol, vegetable intake, fruit intake, level of education, physical activity,                                                    |
| Keszei, András P_2012_      | 9    |                                        | nitrite_  | .12   | 0.97(0.36-2.58) | reference dose: 0.03 - adjusted: age, smoking, total                                                                                                   |
| F_Netherland_Animal sources | 1850 |                                        | mg/day    | .28   | 0.62(0.20-1.90) | intake energy, BMI, alcohol, vegetable intake, fruit intake, level of education, physical activity,                                                    |
|                             | 6    |                                        | nitrate_  | 142.7 | 1.61(0.32-8.06) | reference dose:66.4 - adjusted: age, smoking, total                                                                                                    |
| Keszei, András P_2012_      | 10   | Stomach_<br>Cardia _                   | mg/day    | 98.5  | 1.01(0.30-3.42) | intake energy, BMI, alcohol, vegetable intake, fruit intake, level of education, physical activity,                                                    |
| F_Netherland_Food           | 1848 |                                        | nitrite_  | .12   | 0.8(0.51-1.27)  |                                                                                                                                                        |
| Keszei, András P_2012_      | 1760 |                                        |           |       |                 |                                                                                                                                                        |



|                             |       |     |                 |           |                 |                                                                                                                                                         |                                                                                                                                                          |
|-----------------------------|-------|-----|-----------------|-----------|-----------------|---------------------------------------------------------------------------------------------------------------------------------------------------------|----------------------------------------------------------------------------------------------------------------------------------------------------------|
| M_Netherland_Animal sources | 53    |     | mg/day          | .28       | 1.18(0.75-1.86) | reference dose: 0.02- adjusted: age, smoking, total intake energy, BMI, alcohol, vegetable intake ,fruit intake, level of education, physical activity, |                                                                                                                                                          |
|                             |       | 47  |                 | NDMA_     | .08             | 1(0.64-1.56)                                                                                                                                            | reference dose<=0.04- adjusted: age, smoking, total intake energy, BMI, alcohol, vegetable intake ,fruit intake ,level of education ,physical activity,  |
| Keszei, András P_2012_      | 1776  | 45  |                 | micro/day | .25             | 0.94(0.59-1.49)                                                                                                                                         | reference dose<=0.04- adjusted: age, smoking, total intake energy, BMI, alcohol, vegetable intake ,fruit intake ,level of education ,physical activity,  |
| M_Netherland_Food           |       | 47  |                 | nitrate_  | 100.8           | 1.06(0.68-1.65)                                                                                                                                         | reference dose :68.1- adjusted: age, smoking, total intake energy, BMI ,alcohol, vegetable intake, fruit intake, level of education, physical activity,  |
|                             | 1761  | 43  |                 | mg/day    | 146.2           | 1.01(0.57-1.77)                                                                                                                                         | reference dose :68.1- adjusted: age, smoking, total intake energy, BMI ,alcohol, vegetable intake, fruit intake, level of education, physical activity,  |
| Keszei, András P_2012_      |       | 9   | Stomach_        | NDMA_     | .04             | 0.97(0.34-2.78)                                                                                                                                         | reference dose<=0.03- adjusted: age, smoking, total intake energy, BMI, alcohol, vegetable intake, fruit intake, level of education, physical activity,  |
| F_Netherland_Food           | 1931  | 10  | Cardia          | micro/day | .07             | 1.02(0.33-3.14)                                                                                                                                         | reference dose<=0.03- adjusted: age, smoking, total intake energy, BMI, alcohol, vegetable intake, fruit intake, level of education, physical activity,  |
|                             |       |     | _Adenocarcinoma |           |                 |                                                                                                                                                         |                                                                                                                                                          |
| Keszei, András P_2012_      |       | 50  |                 | nitrite_  | .08             | 0.94(0.62-1.41)                                                                                                                                         | reference dose: 0.02- adjusted: age, smoking, total intake energy, BMI, alcohol, vegetable intake, fruit intake, level of education, physical activity,  |
| F_Netherland_Animal sources | 1986  | 54  |                 | mg/day    | .2              | 1.08(0.71-1.63)                                                                                                                                         | reference dose: 0.02- adjusted: age, smoking, total intake energy, BMI, alcohol, vegetable intake, fruit intake, level of education, physical activity,  |
|                             |       | 70  |                 | NDMA_     | .04             | 1.37(0.92-2.02)                                                                                                                                         | reference dose<=0.03- adjusted: age, smoking, total intake energy, BMI, alcohol, vegetable intake, fruit intake, level of education, physical activity,  |
|                             | 2071  | 44  |                 | micro/day | .07             | 0.9(0.58-1.42)                                                                                                                                          | reference dose<=0.03- adjusted: age, smoking, total intake energy, BMI, alcohol, vegetable intake, fruit intake, level of education, physical activity,  |
| Keszei, András P_2012_      |       | 55  |                 | nitrate_  | 142.7           | 0.78(0.44-1.39)                                                                                                                                         | reference dose:66.4 - adjusted: age, smoking, total intake energy, BMI, alcohol, vegetable intake, fruit intake, level of education, physical activity,  |
| F_Netherland_Food           | 1984  | 46  |                 | mg/day    | 98.5            | 0.73(0.47-1.11)                                                                                                                                         | reference dose:66.4 - adjusted: age, smoking, total intake energy, BMI, alcohol, vegetable intake, fruit intake, level of education, physical activity,  |
|                             |       |     | Stomach_        |           |                 |                                                                                                                                                         |                                                                                                                                                          |
| Keszei, András P_2012_      |       | 109 | Noncardia _     | nitrite_  | .12             | 1.1(0.80-1.50)                                                                                                                                          | reference dose: 0.02 - adjusted: age, smoking, total intake energy, BMI, alcohol, vegetable intake, fruit intake ,level of education, physical activity, |
| M_Netherland_Animal sources | 1950  | 122 |                 | mg/day    | .28             | 1.23(0.89-1.70)                                                                                                                                         | reference dose: 0.02 - adjusted: age, smoking, total intake energy, BMI, alcohol, vegetable intake, fruit intake ,level of education, physical activity, |
|                             |       | 105 |                 | NDMA_     | .04             | 1.09(0.79-1.50)                                                                                                                                         | reference dose<=0.03- adjusted: age, smoking, total intake energy, BMI, alcohol, vegetable intake ,fruit intake, level of education, physical activity,  |
|                             | 1967  | 125 |                 | micro/day | .07             | 1.31(0.95-1.81)                                                                                                                                         | reference dose<=0.03- adjusted: age, smoking, total intake energy, BMI, alcohol, vegetable intake ,fruit intake, level of education, physical activity,  |
| Keszei, András P_2012_      |       | 93  |                 | nitrate_  | 142.7           | 1.05(0.70-1.59)                                                                                                                                         | reference dose :66.4- adjusted: age, smoking, total intake energy, BMI, alcohol, vegetable intake, fruit intake, level of education, physical activity,  |
| M_Netherland_Food           | 1951  | 125 |                 | mg/day    | 98.5            | 1.23(0.90-1.68)                                                                                                                                         | reference dose :66.4- adjusted: age, smoking, total intake energy, BMI, alcohol, vegetable intake, fruit intake, level of education, physical activity,  |
| 8                           |       | 17  |                 | nitrite_  | Q2              | 1.1(0.58-2.11)                                                                                                                                          |                                                                                                                                                          |
|                             |       | 17  |                 |           | Q3              | 1.88(1.01-3.49)                                                                                                                                         |                                                                                                                                                          |
|                             |       | 17  |                 |           | Q4              | 0.71(0.28-1.78)                                                                                                                                         |                                                                                                                                                          |
|                             |       | 17  |                 | nitrate_  | Q2              | 1.01(0.56-1.84)                                                                                                                                         |                                                                                                                                                          |
|                             | 10053 | 17  | Stomach__       |           | Q3              | 0.52(0.25-1.08)                                                                                                                                         | adjusted: sex, age, municipality, smoking, energy intake                                                                                                 |
| Knekt, P._1999_             |       | 17  |                 |           | Q4              | 0.56(0.27-1.18)                                                                                                                                         |                                                                                                                                                          |
| M/F__Food                   |       | 17  |                 | NDMA_     | Q2              | 1.03(0.55-1.95)                                                                                                                                         |                                                                                                                                                          |
|                             |       | 17  |                 |           | Q3              | 0.78(0.39-1.56)                                                                                                                                         |                                                                                                                                                          |
|                             |       | 17  |                 |           | Q4              | 0.75(0.37-1.51)                                                                                                                                         |                                                                                                                                                          |
|                             | 10058 | 19  | Colorectal__    | nitrite_  | Q2              | 0.82(0.45-1.48)                                                                                                                                         |                                                                                                                                                          |
|                             |       | 19  |                 |           | Q3              | 0.94(0.50-1.78)                                                                                                                                         |                                                                                                                                                          |

|    |                                              |              |      |             |                    |                 |                 |                                                                                                                                                                                                      |
|----|----------------------------------------------|--------------|------|-------------|--------------------|-----------------|-----------------|------------------------------------------------------------------------------------------------------------------------------------------------------------------------------------------------------|
|    |                                              |              | 19   |             |                    | Q4              | 0.74(0.34-1.63) |                                                                                                                                                                                                      |
|    |                                              |              | 19   |             | nitrate_           | Q2              | 1.01(0.52-1.92) |                                                                                                                                                                                                      |
|    |                                              |              | 19   |             |                    | Q3              | 0.98(0.51-1.87) |                                                                                                                                                                                                      |
|    |                                              |              | 19   |             |                    | Q4              | 1.04(0.54-2.02) |                                                                                                                                                                                                      |
|    |                                              |              | 19   |             | NDMA_              | Q2              | 1.47(0.69-3.11) |                                                                                                                                                                                                      |
|    |                                              |              | 19   |             |                    | Q3              | 1.95(0.95-3.99) |                                                                                                                                                                                                      |
|    |                                              |              | 19   |             |                    | Q4              | 2.12(1.04-4.33) |                                                                                                                                                                                                      |
| 9  | Larsson, S. C. 2006_<br>M/F_Sweden_Food      | 250408       | 28   | Stomach__   | NDMA_mi<br>cro/day | .061            | 1.03(0.61-1.77) | reference dose=0.017-adj:age,education, BMI,<br>total energy, alcohol, fruit, vegetables                                                                                                             |
|    |                                              |              | 37   |             |                    | .098            | 1.66(1.00-2.75) |                                                                                                                                                                                                      |
|    |                                              |              | 32   |             |                    | .151            | 1.6(0.93-2.76)  |                                                                                                                                                                                                      |
|    |                                              |              | 31   |             |                    | .277            | 1.96(1.08-3.58) |                                                                                                                                                                                                      |
| 10 | Loh, Y. H. 2011_<br>M/F_United Kingdom_Food  | 22920        | 137  | Rectum__    | NDMA_<br>micro/day |                 | 1.46(1.16-1.84) | adjusted: age, sex, BMI, smoking, alcohol, energy<br>intake, physical activity, education, menopausal                                                                                                |
|    |                                              |              | 137  |             | nitrite_<br>mg/day |                 | 1.18(0.97-1.44) |                                                                                                                                                                                                      |
|    |                                              |              | 276  | Colon__     | NDMA_<br>micro/day |                 | 0.99(0.83-1.18) |                                                                                                                                                                                                      |
|    |                                              |              | 276  |             | nitrite_<br>mg/day |                 | 0.89(0.77-1.04) |                                                                                                                                                                                                      |
|    |                                              |              | 64   | Esophagus__ | NDMA_<br>micro/day |                 | 1.13(0.77-1.68) |                                                                                                                                                                                                      |
|    |                                              |              | 64   |             | nitrite_<br>mg/day |                 | 1.14(0.84-1.54) |                                                                                                                                                                                                      |
|    |                                              |              | 55   | Stomach__   | NDMA_<br>micro/day |                 | 1.13(0.81-1.57) |                                                                                                                                                                                                      |
|    |                                              |              | 55   |             | nitrite_<br>mg/day |                 | 0.86(0.63-1.19) |                                                                                                                                                                                                      |
| 11 | Schullehner, J. 2018_<br>M/F_Denmark_Water   | 115224<br>22 | 8844 | Colon__     | nitrate_<br>mg/l   | <1.27           | 1.09(1.03-1.15) | adjusted: age, sex, year of birth, previous cancer<br>diagnosis and highest attained education                                                                                                       |
|    |                                              |              | 8652 |             |                    | 1.27-2.33       | 1.09(1.02-1.16) |                                                                                                                                                                                                      |
|    |                                              |              | 6966 |             |                    | 2.33-3.87       | 1.08(1.01-1.16) |                                                                                                                                                                                                      |
|    |                                              |              | 6025 |             |                    | 3.87-9.25       | 1.11(1.03-1.19) |                                                                                                                                                                                                      |
|    |                                              |              | 3700 | >=9.25      |                    | 1.14(1.04-1.26) |                 |                                                                                                                                                                                                      |
|    |                                              | 115098       | 5495 | Rectum__    |                    | 1.27-2.33       | 1.08(0.99-1.16) |                                                                                                                                                                                                      |
|    |                                              | 04           | 4384 |             |                    | 2.33-3.87       | 1.1(1.01-1.19)  |                                                                                                                                                                                                      |
|    |                                              |              | 3764 |             |                    | 3.87-9.25       | 1.1(1.01-1.21)  |                                                                                                                                                                                                      |
|    |                                              |              | 5618 |             |                    | <1.27           | 1.07(0.99-1.15) |                                                                                                                                                                                                      |
|    |                                              |              | 2308 |             |                    | >=9.25          | 1.13(1.00-1.27) |                                                                                                                                                                                                      |
| 12 | van Loon, A. J. 1998_<br>M/F_netherland_Food | 3405         | 51   | Stomach__   | nitrite_<br>mg/day | .04             | 1.2(0.78-1.86)  | reference dose: 0.01 - adjusted: multivariate(age,<br>sex, smoking, education, coffee consumption,<br>vitamin C, beta-carotene, family history, stomach<br>disorder, use of refrigerator and freezer |
|    |                                              |              | 58   |             |                    | .09             | 1.18(0.77-1.82) |                                                                                                                                                                                                      |
|    |                                              |              | 46   |             |                    | .16             | 0.88(0.56-1.37) |                                                                                                                                                                                                      |
|    |                                              |              | 80   |             |                    | .35             | 1.44(0.95-2.18) |                                                                                                                                                                                                      |

|    |                                               |      |     |           |                    |    |       |                 |                                                                                                                                                                                              |
|----|-----------------------------------------------|------|-----|-----------|--------------------|----|-------|-----------------|----------------------------------------------------------------------------------------------------------------------------------------------------------------------------------------------|
|    | van Loon, A. J._1998_<br>M/F_netherland_Water |      |     |           | nitrate_<br>mg/day | 61 | 79.4  | 1.02(0.69-1.51) | reference dose: 55.8 - adjusted: multivariate(age, sex, smoking, education, coffee consumption, vitamin C, beta-carotene, family history, stomach disorder, use of refrigerator and freezer) |
|    |                                               |      |     |           |                    | 45 | 98.7  | 0.71(0.46-1.09) |                                                                                                                                                                                              |
|    |                                               |      |     |           |                    | 49 | 120.7 | 0.8(0.51-1.25)  |                                                                                                                                                                                              |
|    |                                               |      |     |           |                    | 58 | 172.2 | 0.8(0.47-1.37)  |                                                                                                                                                                                              |
|    |                                               |      |     |           | nitrate_<br>mg/day | 54 | 1.65  | 0.93(0.62-1.39) | reference dose: 0.02- adjusted: multivariate(age, sex, smoking, education, coffee consumption, vitamin C, beta-carotene, family history, stomach disorder, use of refrigerator and freezer)  |
|    |                                               |      |     |           |                    | 53 | 3.85  | 0.87(0.58-1.31) |                                                                                                                                                                                              |
|    |                                               |      |     |           |                    | 57 | 6.91  | 0.83(0.55-1.24) |                                                                                                                                                                                              |
|    |                                               |      |     |           |                    | 57 | 16.5  | 0.88(0.59-1.32) |                                                                                                                                                                                              |
| 13 | van Loon, A. J._1997_<br>M/F_netherland_Water | 3750 | 250 | Stomach__ | nitrate_<br>mg/day |    | 4     | 1.02(0.62-1.68) | adjusted: smoking-education-beta-carotene-vitamin C-family history                                                                                                                           |
|    | van Loon, A. J._1997_<br>M/F_netherland_Food  | 3750 | 250 |           |                    |    | 99    | 0.62(0.31-1.22) | adjusted: smoking- education-beta-carotene-vitamin C-family history                                                                                                                          |

| Table 2: Characteristics of case-control studies in the systematic review. |                                           |                        |                              |             |                        |                           |                     |                                                           |  |
|----------------------------------------------------------------------------|-------------------------------------------|------------------------|------------------------------|-------------|------------------------|---------------------------|---------------------|-----------------------------------------------------------|--|
| num                                                                        | Firstauthor_<br>Year_Gender_Locatio       | Numbe<br>r of<br>Cases | Numbe<br>rof<br>Control<br>s | Cancer type | Analytical<br>Category | Consumption<br>Categories | Adjusted OR<br>95CI | adjusted                                                  |  |
| 1                                                                          | Angela Coss_2003_<br>F_USA_Animal sources | 32                     | 164                          | Pancrase__  | Nitrite_<br>mg/day     | 0.13-0.18                 | 2.4(1.2-4.7)        | reference dose<0.13- adjusted: age, cigarette use, energy |  |
|                                                                            |                                           | 26                     | 147                          |             |                        | 0.19-0.26                 | 1.9(0.94-4.0)       |                                                           |  |
|                                                                            |                                           | 51                     | 180                          |             |                        | >0.26                     | 3.2(1.6-6.4)        |                                                           |  |
|                                                                            | Angela Coss_2003_<br>M_USA_Animal sources | 22                     | 282                          |             |                        | 0.22-0.31                 | 2.1(0.95-4.8)       | reference dose<0.22- adjusted: age, cigarette use, energy |  |
|                                                                            |                                           | 60                     | 359                          |             |                        | 0.32-0.53                 | 3.8(1.8-8.0)        |                                                           |  |
|                                                                            |                                           | 50                     | 342                          |             |                        | >0.53                     | 2.3(1.1-5.1)        |                                                           |  |
|                                                                            | Angela Coss_2003_<br>F_USA_Food           | 32                     | 146                          |             | Nitrite_<br>mg/day     | 0.56-0.71                 | 1.8(0.94-3.4)       | reference dose<0.56- adjusted: age, cigarette use, energy |  |
|                                                                            |                                           | 32                     | 168                          |             |                        | 0.72-0.93                 | 1.4(0.72-2.6)       |                                                           |  |
|                                                                            |                                           | 40                     | 181                          |             |                        | >0.93                     | 1.3(0.65-2.5)       |                                                           |  |
|                                                                            |                                           | 33                     | 157                          |             | Nitrate_<br>mg/day     | 63-90                     | 0.99(0.58-1.7)      | reference dose<63- adjusted: age, cigarette use, energy   |  |
|                                                                            |                                           | 24                     | 158                          |             |                        | 91-126                    | 0.64(0.36-1.1)      |                                                           |  |
|                                                                            |                                           | 26                     | 160                          |             |                        | >126                      | 0.53(0.29-0.97)     |                                                           |  |
|                                                                            | Angela Coss_2003_<br>M_USA_Food           | 22                     | 307                          |             | Nitrite_<br>mg/day     | 0.75-0.98                 | 1(0.52-2.0)         | reference dose<0.75- adjusted: age, cigarette use, energy |  |
|                                                                            |                                           | 40                     | 333                          |             |                        | 0.99-1.30                 | 1.5(0.81-2.9)       |                                                           |  |
|                                                                            |                                           | 64                     | 374                          |             |                        | >1.30                     | 1.5(0.79-3.0)       |                                                           |  |
|                                                                            |                                           | 33                     | 311                          |             | Nitrate_<br>mg/day     | 58-82                     | 1.1(0.63-1.9)       | reference dose<58- adjusted: age, cigarette use, energy   |  |
|                                                                            |                                           | 39                     | 311                          |             |                        | 83-117                    | 1.2(0.70-2.0)       |                                                           |  |
|                                                                            |                                           | 43                     | 327                          |             |                        | >117                      | 1(0.60-1.8)         |                                                           |  |
| 2                                                                          | Buiatti, E._1990_                         | 203                    | 231                          | Stomach__   | Nitrate_               | 81                        | 0.9(0.7-1.1)        |                                                           |  |

|                          |                         |            |                          |                         |                            |                  |                                                                    |              |                                                                       |                    |             |
|--------------------------|-------------------------|------------|--------------------------|-------------------------|----------------------------|------------------|--------------------------------------------------------------------|--------------|-----------------------------------------------------------------------|--------------------|-------------|
| 3                        | De Roos, A. J. 2003_    | M/F__Water | 116                      | 380                     | Colon__                    | Nitrate_<br>mg/l | >1 to <=3                                                          | 1(0.8-1.3)   | reference dose:53- adjusted: non-dietary<br>variables and kilocalorie |                    |             |
|                          |                         |            | 27                       | 124                     |                            |                  | >3 to <=5                                                          | 0.7(0.4-1.1) |                                                                       |                    |             |
|                          |                         |            | 61                       | 174                     |                            |                  | >5                                                                 | 1.2(0.8-1.7) |                                                                       |                    |             |
|                          |                         |            | 98                       | 380                     |                            |                  | >1 to <=3                                                          | 0.8(0.6-1.1) |                                                                       |                    |             |
|                          |                         |            | 30                       | 124                     |                            |                  | >3 to <=5                                                          | 0.7(0.5-1.2) |                                                                       |                    |             |
|                          |                         |            | 56                       | 174                     |                            |                  | >5                                                                 | 1.2(0.8-1.8) |                                                                       |                    |             |
|                          |                         |            | 4                        | De Stefani, E. 1998_    |                            |                  | M/F_Uruguay_Food                                                   | 340          |                                                                       | 698                | Stomach__   |
| 224                      | 459                     |            |                          |                         | 1.63(1.39-1.91)            |                  |                                                                    |              |                                                                       |                    |             |
| 116                      | 239                     |            |                          |                         | 1.34(1.08-1.67)            |                  |                                                                    |              |                                                                       |                    |             |
| 116                      | 239                     |            |                          |                         | 0.79(0.62-1.01)            |                  |                                                                    |              |                                                                       |                    |             |
| 224                      | 459                     | Nitrite_   |                          |                         | 0.52(0.43-0.62)            |                  |                                                                    |              |                                                                       |                    |             |
| 340                      | 698                     |            |                          |                         | 0.55(0.48-0.62)            |                  |                                                                    |              |                                                                       |                    |             |
| 5                        | De Stefani, E. 2001_    |            |                          |                         | M/F_Uruguay_Animal sources | 27               |                                                                    | 88           | Stomach__                                                             | NDMA_<br>micro/day |             |
|                          |                         | 57         | >2.6                     | 2.2(1.2-4.1)            |                            |                  |                                                                    |              |                                                                       |                    |             |
|                          |                         | 41         | Nitrate_<br>mg/day       | 524-784                 |                            | 1.1(0.6-1.8)     | reference dose<523- adjusted: age, gender,<br>residence, education |              |                                                                       |                    |             |
|                          |                         | 34         |                          | >785                    |                            | 0.9(0.5-1.6)     |                                                                    |              |                                                                       |                    |             |
|                          |                         | 48         | Nitrite_<br>mg/day       | 6.3-10.0                |                            | 1.5(0.9-2.6)     | reference dose<6.2- adjusted: age, gender,<br>residence, education |              |                                                                       |                    |             |
|                          |                         | 43         |                          | >10.1                   |                            | 1.8(1.0-3.2)     |                                                                    |              |                                                                       |                    |             |
|                          |                         | 6          | Espejo-Herrera, N. 2016_ | F_spain and italy_Water |                            | 158              | 349                                                                |              |                                                                       |                    | Colorectal_ |
| 247                      | 360                     |            |                          |                         | >10                        | 1.41(1.04-1.91)  |                                                                    |              |                                                                       |                    |             |
| 30                       | 349                     |            |                          |                         | >5-10                      | 0.87(0.52-1.45)  |                                                                    |              |                                                                       |                    |             |
| 70                       | 360                     |            |                          |                         | >10                        | 1.49(0.89-2.48)  |                                                                    |              |                                                                       |                    |             |
| 122                      | 349                     |            |                          |                         | >5-10                      | 1.33(0.97-1.80)  |                                                                    |              |                                                                       |                    |             |
| 174                      | 360                     |            |                          |                         | >10                        | 1.46(1.04-2.05)  |                                                                    |              |                                                                       |                    |             |
| Espejo-Herrera, N. 2016_ | M_spain and italy_Water |            | 289                      | 454                     | Colorectal_                | >5-10            | 1.16(0.94-1.44)                                                    |              |                                                                       |                    |             |
|                          |                         |            | 397                      | 468                     |                            | >10              | 1.5(1.21-1.87)                                                     |              |                                                                       |                    |             |
|                          |                         |            | 80                       | 454                     |                            | >5-10            | 0.94(0.68-1.28)                                                    |              |                                                                       |                    |             |
|                          |                         |            | 133                      | 468                     |                            | >10              | 1.55(1.16-2.08)                                                    |              |                                                                       |                    |             |
|                          |                         |            |                          |                         |                            |                  |                                                                    |              |                                                                       |                    |             |
|                          |                         |            |                          |                         |                            |                  |                                                                    |              |                                                                       |                    |             |

|                                                                  |                                                  |     |      |              |                    |             |                   |                                                                                                                                     |
|------------------------------------------------------------------|--------------------------------------------------|-----|------|--------------|--------------------|-------------|-------------------|-------------------------------------------------------------------------------------------------------------------------------------|
|                                                                  |                                                  | 202 | 454  | Colon__      |                    | >5-10       | 1.26(0.99-1.61)   |                                                                                                                                     |
|                                                                  |                                                  | 260 | 468  |              |                    | >10         | 1.51(1.17-1.94)   |                                                                                                                                     |
| Espejo-Herrera, N._<br>2016_M/F_spain and<br>italy_Water         |                                                  | 447 | 803  | Colorectal__ |                    | >5-10       | 1.17(0.98-1.38)   |                                                                                                                                     |
|                                                                  |                                                  | 644 | 828  |              |                    | >10         | 1.49(1.24-1.78)   |                                                                                                                                     |
|                                                                  |                                                  | 110 | 803  | Rectum__     |                    | >5-10       | 0.93(0.70-1.23)   |                                                                                                                                     |
|                                                                  |                                                  | 203 | 828  |              |                    | >10         | 1.62(1.23-2.14)   |                                                                                                                                     |
|                                                                  |                                                  | 324 | 803  | Colon__      |                    | >5-10       | 1.28(1.06-1.55)   |                                                                                                                                     |
|                                                                  |                                                  | 434 | 828  |              |                    | >10         | 1.52(1.24-1.86)   |                                                                                                                                     |
| Espejo-Herrera, N._<br>2016_M/F_spain and italy_Food             |                                                  | 564 | 1058 | Colorectal__ |                    | 83-133      | 0.97(0.83-1.14)   | reference dose: <83 - adjusted: sex, age,<br>education, physical activity, NSAID drug, family<br>history, BMI, intake energy, fiber |
|                                                                  |                                                  | 527 | 1057 |              |                    | >133        | 0.84(0.70-1.00)   |                                                                                                                                     |
|                                                                  |                                                  | 394 | 1058 | Colon__      |                    | 83-133      | 1.04(0.87-1.24)   |                                                                                                                                     |
|                                                                  |                                                  | 371 | 1057 |              |                    | >133        | 0.9(0.74-1.10)    |                                                                                                                                     |
|                                                                  |                                                  | 161 | 1058 | Rectum__     |                    | 83-133      | 0.85(0.66-1.08)   |                                                                                                                                     |
|                                                                  |                                                  | 151 | 1057 |              |                    | >133        | 0.76(0.58-1.00)   |                                                                                                                                     |
| Espejo-Herrera,<br>N._2016_M/F_spain and<br>italy_Animal sources |                                                  | 578 | 1058 | Colorectal__ |                    | 4.5-6.8     | 1.15(0.98-1.35)   | reference dose: <4.5 - adjusted: sex, age,<br>education, physical activity, NSAID drug, family<br>history, BMI, intake energy       |
|                                                                  |                                                  | 634 | 1057 |              |                    | >6.8        | 1.16(0.98-1.38)   |                                                                                                                                     |
|                                                                  |                                                  | 191 | 1058 | Rectum__     |                    | 4.5-6.8     | 1.59(1.22-2.06)   |                                                                                                                                     |
|                                                                  |                                                  | 204 | 1057 |              |                    | >6.8        | 1.55(1.17-2.05)   |                                                                                                                                     |
|                                                                  |                                                  | 423 | 1057 | Colon__      |                    | >6.8        | 1.06(0.87-1.30)   |                                                                                                                                     |
|                                                                  |                                                  | 378 | 1058 |              |                    | 4.5-6.8     | 1.03(0.86-1.24)   |                                                                                                                                     |
| Espejo-Herrera,<br>N._2016_M/F_spain and<br>italy_Plant sources  |                                                  | 575 | 1058 | Colorectal__ |                    | 68-118      | 0.99(0.85-1.16)   | reference dose: <68 - adjusted: sex, age,<br>education, physical activity, NSAID drug, family<br>history, BMI, intake energy, fiber |
|                                                                  |                                                  | 513 | 1057 |              |                    | >118        | 0.83(0.70-0.99)   |                                                                                                                                     |
|                                                                  |                                                  | 169 | 1058 | Rectum__     |                    | 68-118      | 1.04(0.71-1.16)   |                                                                                                                                     |
|                                                                  |                                                  | 144 | 1057 |              |                    | >118        | 0.9(0.57-0.99)    |                                                                                                                                     |
|                                                                  |                                                  | 397 | 1058 | Colon__      |                    | 68-118      | 1.04(0.87-1.24)   |                                                                                                                                     |
|                                                                  |                                                  | 364 | 1057 |              |                    | >118        | 0.89(0.73-1.08)   |                                                                                                                                     |
| 7                                                                | Fathmawati_2017_M/F_Indones<br>ia_Water          | 3   | 4    | Colorectal__ | Nitrate_<br>mg/l   | >50         | 1.405(0.14-13.67) | adjusted: protein intake, smoking history, age,<br>family history of cancer, diabetic                                               |
|                                                                  |                                                  | 16  | 4    |              |                    | >50         | 4.312(1.31-14.09) |                                                                                                                                     |
| 8                                                                | Hernández-Ramírez, R.<br>U._2009_M/F_Mexico_Food | 82  | 159  | Stomach__    | Nitrite_<br>mg/day | >1.0-1.2    | 1.07(0.69-1.65)   | reference dose<1.0- adjusted: energy, age,<br>gender                                                                                |
|                                                                  |                                                  | 82  | 159  |              |                    | >1.2        | 1.52(0.99-2.34)   |                                                                                                                                     |
|                                                                  |                                                  | 76  | 156  |              | Nitrate_<br>mg/day | >90.4-141.7 | 0.93(0.62-1.39)   | reference dose: <90.4- adjusted: energy, age,<br>gender                                                                             |
|                                                                  |                                                  | 76  | 156  |              |                    | >141.7      | 0.61(0.39-0.96)   |                                                                                                                                     |
|                                                                  |                                                  | 82  | 159  |              | Nitrite_<br>mg/day | >0.2-0.4    | 0.78(0.50-1.21)   | reference dose<0.2- adjusted: energy, age,<br>gender                                                                                |
|                                                                  |                                                  | 82  | 159  |              |                    | >0.4        | 1.56(1.02-2.4)    |                                                                                                                                     |
|                                                                  |                                                  | 76  | 156  |              | Nitrate_<br>mg/day | >1.7-3.9    | 1.28(0.82-2.0)    | reference dose: <1.7- adjusted adj: energy, age,<br>gender                                                                          |
|                                                                  |                                                  | 76  | 156  |              |                    | >3.9        | 1.92(1.23-3.02)   |                                                                                                                                     |
|                                                                  |                                                  | 82  | 159  |              | Nitrite_<br>mg/day | >0.1-0.2    | 0.81(0.54-1.21)   | reference dose<0.1- adjusted: energy, age,<br>gender                                                                                |
|                                                                  |                                                  | 82  | 159  |              |                    | >0.2        | 0.77(0.50-1.18)   |                                                                                                                                     |
|                                                                  |                                                  | 76  | 156  |              | Nitrate_<br>mg/day | >81.7-134.9 | 0.93(0.62-1.39)   | reference dose: <81.7- adjusted: energy, age,<br>gender                                                                             |
|                                                                  |                                                  | 76  | 156  |              |                    | >134.9      | 0.62(0.40-0.97)   |                                                                                                                                     |

|    |                                              |     |        |                                              |                              |             |                 |                                                                                                                                                                                                                                                                                                                                                                                                                                                                                              |
|----|----------------------------------------------|-----|--------|----------------------------------------------|------------------------------|-------------|-----------------|----------------------------------------------------------------------------------------------------------------------------------------------------------------------------------------------------------------------------------------------------------------------------------------------------------------------------------------------------------------------------------------------------------------------------------------------------------------------------------------------|
| 9  | Jakszyn, P._2006_M/F_European countries_Food | 105 | 146359 | Stomach__<br>NDMA_<br>micro/day              |                              | .09         | 0.87(0.64–1.2)  | reference dose: <0.09-<br>adj:sex,height,weight,education,smoking,physi<br>cal activity, fruits intake, energy, nitrites                                                                                                                                                                                                                                                                                                                                                                     |
|    |                                              | 31  | 146359 |                                              |                              | .195        | 0.99(0.69–1.41) |                                                                                                                                                                                                                                                                                                                                                                                                                                                                                              |
|    |                                              | 31  | 146359 |                                              |                              | .09         | 1.04(0.66–1.63) |                                                                                                                                                                                                                                                                                                                                                                                                                                                                                              |
|    |                                              | 52  | 146359 |                                              |                              | .195        | 1.09(0.65–1.81) |                                                                                                                                                                                                                                                                                                                                                                                                                                                                                              |
|    |                                              | 52  | 146359 |                                              |                              | .09         | 0.74(0.41–1.34) |                                                                                                                                                                                                                                                                                                                                                                                                                                                                                              |
|    |                                              | 105 | 146359 |                                              |                              | .195        | 0.68(0.34–1.37) |                                                                                                                                                                                                                                                                                                                                                                                                                                                                                              |
| 10 | Kim, H. J._2007_M/F_Korea_Food               | 67  | 68     | Stomach__<br>Nitrate_<br>mg/day              |                              | 458         | 1.13(0.54–2.36) | reference dose: 240- adjusted: age (<50, 50–59, 60–69, and ≥70 yr), sex, socioeconomic status (low, medium, and high status; low status indicates below elementary school in education and \$ 8500 in annual income), family history (yes and no for only first-degree relatives), refrigerator use (<20 yr and ≥20 yr), H. pylori infection, and foods (charcoal grilled beef, Korean cabbage kimchi, Dongchimi, spinach, garlic, mushroom, and salty foods; low, medium, and high intake). |
|    |                                              | 32  | 34     |                                              |                              | 811         | 1.13(0.42–3.06) |                                                                                                                                                                                                                                                                                                                                                                                                                                                                                              |
|    |                                              |     |        |                                              |                              |             |                 |                                                                                                                                                                                                                                                                                                                                                                                                                                                                                              |
| 11 | La Vecchia, C._1994_M/F_Italy_Food           | 128 | 404    | Stomach__                                    | Nitrite_<br>mg/day           | 2.41        | 0.98(0.72-1.33) | reference:1.91- adjusted: multiple logistic regression(age, sex, education, family history, BMI, total energy)                                                                                                                                                                                                                                                                                                                                                                               |
|    |                                              | 126 | 405    |                                              |                              | 2.94        | 0.99(0.72-1.36) |                                                                                                                                                                                                                                                                                                                                                                                                                                                                                              |
|    |                                              | 153 | 406    |                                              |                              | 3.64        | 1.15(0.84-1.59) |                                                                                                                                                                                                                                                                                                                                                                                                                                                                                              |
|    |                                              | 193 | 404    |                                              |                              | >3.64       | 1.35(0.96-1.88) |                                                                                                                                                                                                                                                                                                                                                                                                                                                                                              |
|    |                                              | 156 | 405    | Stomach__                                    | Nitrate_<br>mg/day           | 80.7        | 0.64(0.49-0.83) | reference:62.96- adjusted: multiple logistic regression (age, sex, education, family history, BMI, total energy)                                                                                                                                                                                                                                                                                                                                                                             |
|    |                                              | 117 | 404    |                                              |                              | 96.33       | 0.5(0.38-0.67)  |                                                                                                                                                                                                                                                                                                                                                                                                                                                                                              |
|    |                                              | 117 | 406    |                                              |                              | 116.88      | 0.52(0.39-0.70) |                                                                                                                                                                                                                                                                                                                                                                                                                                                                                              |
|    |                                              | 105 | 404    |                                              |                              | >116.88     | 0.43(0.32-0.59) |                                                                                                                                                                                                                                                                                                                                                                                                                                                                                              |
| 12 | La Vecchia, C._1995_M/F_Italy_Food           | 231 | 687    | Stomach__                                    | NDMA_<br>micro/day           | 0.131-0.190 | 1.11(0.9-1.4)   | Reference dose<=0.130- adjusted: age, sex, education, family history. carotene, vitamin C, total calories, nitrite, nitrate                                                                                                                                                                                                                                                                                                                                                                  |
|    |                                              | 308 | 683    |                                              |                              | >0.191      | 0.191(1.1-1.7)  |                                                                                                                                                                                                                                                                                                                                                                                                                                                                                              |
| 13 | La Vecchia, C._1997_M/F_Italy_Food           | 407 | 987    | Stomach__Car<br>cinoma                       | Nitrite_<br>mg/day           | >=2.7       | 1.44(1.2-1.7)   | reference dose<2.7-adj:sex,age,education,                                                                                                                                                                                                                                                                                                                                                                                                                                                    |
| 14 | Lopez-Carrillo, L._2004_M/F_Mexico_Food      | 60  | 146    | Stomach__                                    | Nitrite_<br>portions/d<br>ay | 0.12–0.26   | 0.95(0.62-1.46) | reference dose=0-0.11- adjusted: age, gender, energy, socioeconomic ,education, Hp/CagA status and ascorbic acid                                                                                                                                                                                                                                                                                                                                                                             |
|    |                                              | 83  | 148    |                                              |                              | 0.27–2.25   | 1.24(0.81-1.90) |                                                                                                                                                                                                                                                                                                                                                                                                                                                                                              |
| 15 | Mayne, S. T._2001_M/F_USA_Food               | 255 | 687    | Stomach_<br>Cardia_Adeno<br>carcinoma        | Nitrite_<br>mg/day           |             | 1.12(0.87-1.44) | adjusted: sex; site (Connecticut, Washington, New Jersey); age; race (white versus other); proxy status; income; education; usual body mass index; cigarettes/day; years of consuming beer, wine, and liquor (each); and energy intake.                                                                                                                                                                                                                                                      |
|    |                                              | 352 | 687    | Stomach_Non<br>cardia<br>_Adenocarcin<br>oma |                              |             | 1.64(1.30-2.07) |                                                                                                                                                                                                                                                                                                                                                                                                                                                                                              |

|                                       |     |     |                                           |                                                   |                 |                 |                                                                                                                                                        |
|---------------------------------------|-----|-----|-------------------------------------------|---------------------------------------------------|-----------------|-----------------|--------------------------------------------------------------------------------------------------------------------------------------------------------|
|                                       | 206 | 687 | Esophagus__S<br>quamous cell<br>carcinoma |                                                   | 1.12(0.84-1.51) |                 |                                                                                                                                                        |
|                                       | 282 | 687 | Esophagus__A<br>denocarcinom<br>a         |                                                   | 1.02(0.80-1.30) |                 |                                                                                                                                                        |
| 16                                    | 22  | 19  | Colorectal_                               | Nitrate_<br>mg/l                                  | 0.5-1.9         | 1.39(1.02-1.89) | reference dose<0.5- adjusted: age, interview<br>period                                                                                                 |
|                                       | 29  | 25  |                                           |                                                   | 2.5-5.9         | 1.32(0.99-1.76) |                                                                                                                                                        |
|                                       | 12  | 11  |                                           |                                                   | 6.0-9.9         | 1.28(0.88-1.88) |                                                                                                                                                        |
|                                       | 7   | 6   |                                           |                                                   | >10.0           | 1.57(0.97-2.52) |                                                                                                                                                        |
|                                       | 23  | 19  | Rectum__                                  |                                                   | 0.5-1.9         | 1.29(0.73-2.31) |                                                                                                                                                        |
|                                       | 28  | 25  |                                           |                                                   | 2.5-5.9         | 1.19(0.69-2.06) |                                                                                                                                                        |
|                                       | 10  | 11  |                                           |                                                   | 6.0-9.9         | 1.11(0.52-2.36) |                                                                                                                                                        |
|                                       | 5   | 6   |                                           |                                                   | >10.0           | 1.26(0.47-3.43) |                                                                                                                                                        |
| McElroy, J. A._2008_<br>M/F_USA_Water | 24  | 19  | Colon_<br>distal _                        |                                                   | 0.5-1.9         | 1.58(1.03-2.40) |                                                                                                                                                        |
|                                       | 29  | 25  |                                           |                                                   | 2.5-5.9         | 1.38(0.92-2.06) |                                                                                                                                                        |
|                                       | 12  | 11  |                                           |                                                   | 6.0-9.9         | 1.43(0.85-2.41) |                                                                                                                                                        |
|                                       | 5   | 6   |                                           |                                                   | >10.0           | 1.23(0.59-2.56) |                                                                                                                                                        |
|                                       | 20  | 19  | Colon_<br>Proximal_                       |                                                   | 0.5-1.9         | 1.35(0.81-2.26) |                                                                                                                                                        |
|                                       | 28  | 25  |                                           |                                                   | 2.5-5.9         | 1.36(0.85-2.17) |                                                                                                                                                        |
|                                       | 12  | 11  |                                           |                                                   | 6.0-9.9         | 1.34(0.73-2.47) |                                                                                                                                                        |
|                                       | 11  | 6   |                                           |                                                   | >10.0           | 2.76(1.42-5.38) |                                                                                                                                                        |
| 17                                    | 177 | 207 | Colorectal_                               | Nitrate<br>and<br>Nitrite_<br>micro/100<br>0 kcal | 114.6-197.0     | 0.98(0.72-1.32) | reference dose< 114.6 - adjusted: age, sex,<br>total energy intake, body mass index, past<br>regular NSAID use, and fruit and vegetable<br>consumption |
|                                       | 194 | 207 |                                           |                                                   | 197.1-310.2     | 1.07(0.79-1.45) |                                                                                                                                                        |
|                                       | 211 | 207 |                                           |                                                   | 310.3-496.6     | 1.09(0.80-1.47) |                                                                                                                                                        |
|                                       | 225 | 207 |                                           |                                                   | > 496.6         | 1.19(0.87-1.61) |                                                                                                                                                        |
|                                       | 124 | 207 | Colon__                                   |                                                   | 114.6-197.0     | 1.02(0.73-1.42) |                                                                                                                                                        |
|                                       | 140 | 207 |                                           |                                                   | 197.1-310.2     | 1.15(0.83-1.61) |                                                                                                                                                        |
|                                       | 146 | 207 |                                           |                                                   | 310.3-496.6     | 1.14(0.82-1.60) |                                                                                                                                                        |
|                                       | 157 | 207 |                                           |                                                   | > 496.6         | 1.28(0.92-1.80) |                                                                                                                                                        |
|                                       | 75  | 207 | Colon_<br>Proximal_                       |                                                   | 114.6-197.0     | 1.05(0.71-1.56) |                                                                                                                                                        |
|                                       | 86  | 207 |                                           |                                                   | 197.1-310.2     | 1.25(0.85-1.86) |                                                                                                                                                        |
|                                       | 76  | 207 |                                           |                                                   | 310.3-496.6     | 1.06(0.71-1.58) |                                                                                                                                                        |
|                                       | 102 | 207 |                                           |                                                   | > 496.6         | 1.57(1.06-2.34) |                                                                                                                                                        |
|                                       | 45  | 207 | Colon_<br>distal_                         |                                                   | 114.6-197.0     | 0.99(0.62-1.59) |                                                                                                                                                        |
|                                       | 50  | 207 |                                           |                                                   | 197.1-310.2     | 1.06(0.67-1.70) |                                                                                                                                                        |
|                                       | 64  | 207 |                                           |                                                   | 310.3-496.6     | 1.28(0.81-2.01) |                                                                                                                                                        |
|                                       | 51  | 207 |                                           |                                                   | > 496.6         | 0.98(0.61-1.58) |                                                                                                                                                        |
|                                       | 52  | 207 | Rectum__                                  | 114.6-197.0                                       | 0.95(0.61-1.48) |                 |                                                                                                                                                        |
|                                       | 54  | 207 |                                           | 197.1-310.2                                       | 0.96(0.62-1.50) |                 |                                                                                                                                                        |
|                                       | 63  | 207 |                                           | 310.3-496.6                                       | 1.02(0.66-1.58) |                 |                                                                                                                                                        |
|                                       |     |     |                                           |                                                   |                 |                 |                                                                                                                                                        |

|           |                                                   |     |     |              |  |                    |                 |                                                                                                                                                                  |
|-----------|---------------------------------------------------|-----|-----|--------------|--|--------------------|-----------------|------------------------------------------------------------------------------------------------------------------------------------------------------------------|
|           |                                                   | 67  | 207 |              |  | > 496.6            | 1.04(0.67-1.62) |                                                                                                                                                                  |
| <b>18</b> |                                                   | 286 | 187 |              |  | NDMA_<br>micro/day | .2              | 1.1(0.8-1.6)                                                                                                                                                     |
|           |                                                   | 286 | 187 |              |  |                    | .33             | 1.1(0.8-1.5)                                                                                                                                                     |
|           | Palli, D._2001_<br>M/F_Italy_Food                 | 286 | 187 | Stomach__    |  | Nitrate_<br>mg/day | 93.2            | 0.7(0.5-1.0)                                                                                                                                                     |
|           |                                                   | 286 | 187 |              |  |                    | 132.9           | 0.6(0.4-0.9)                                                                                                                                                     |
|           |                                                   | 286 | 187 |              |  | Nitrite_<br>mg/day | 3.5             | 1.4(1.0-2.0)                                                                                                                                                     |
|           |                                                   | 286 | 187 |              |  |                    | 5.4             | 1.4(1.0-2.0)                                                                                                                                                     |
|           |                                                   |     |     |              |  |                    |                 | reference dose: 0.12- adjusted: multiple logistic regressions( age, sex, social class, family history, BMI, total energy)                                        |
|           |                                                   |     |     |              |  |                    |                 | reference dose: 62.6- adjusted: multiple logistic regressions( age, sex, social class, family history, BMI, total energy)                                        |
|           |                                                   |     |     |              |  |                    |                 | reverence dose: 2.5- adjusted: multiple logistic regressions( age, sex, social class, family history, BMI, total energy)                                         |
| <b>19</b> |                                                   |     |     |              |  | NDMA_<br>micro/day | .25             | 4.13(0.93-18.27)                                                                                                                                                 |
|           |                                                   |     |     |              |  |                    | .51             | 7(1.85-26.46)                                                                                                                                                    |
|           | Pobel, D._1995_<br>M/F_France_Food                |     |     |              |  | Nitrite_<br>mg/day | 1.98            | 0.83(0.41-1.67)                                                                                                                                                  |
|           |                                                   |     |     |              |  |                    | 2.26            | 0.88(0.44-1.79)                                                                                                                                                  |
|           |                                                   | 31  | 43  | Stomach__    |  | Nitrate_<br>mg/day | 137.26          | 0.49(0.24-1.01)                                                                                                                                                  |
|           |                                                   |     |     |              |  |                    | 192.73          | 0.76(0.38-1.50)                                                                                                                                                  |
|           |                                                   |     |     |              |  | Nitrite_<br>mg/day | 1.98            | 0.74(0.37-1.48)                                                                                                                                                  |
|           |                                                   |     |     |              |  |                    | 2.26            | 0.77(0.38-1.57)                                                                                                                                                  |
|           | Pobel, D._1995_<br>M/F_France_Plant sources       |     |     |              |  | Nitrate_<br>mg/day | 137.26          | 0.52(0.26-1.07)                                                                                                                                                  |
|           |                                                   |     |     |              |  |                    | 192.73          | 0.73(0.37-1.45)                                                                                                                                                  |
|           |                                                   |     |     |              |  |                    |                 | reverence dose:0.20- adjusted: age, sex, occupation , calorie intake                                                                                             |
|           |                                                   |     |     |              |  |                    |                 | reverence dose:1.61- adjusted: age, sex, occupation , calorie intake                                                                                             |
|           |                                                   |     |     |              |  |                    |                 | reverence dose:89.03- adjusted: age, sex, occupation , calorie intake                                                                                            |
|           |                                                   |     |     |              |  |                    |                 | reverence dose:1.61- adjusted: age, sex, occupation , calorie intake                                                                                             |
|           |                                                   |     |     |              |  |                    |                 | reverence dose:89.03- adjusted: age, sex, occupation , calorie intake                                                                                            |
| <b>20</b> |                                                   | 79  | 197 |              |  |                    | .03             | 0.57(0.40-0.83)                                                                                                                                                  |
|           |                                                   | 72  | 197 |              |  | Nitrate_<br>mg/day | .06             | 0.48(0.33-0.70)                                                                                                                                                  |
|           | Rick J.Jansen_2013_<br>M/F_USA_Ainimal sources    | 60  | 196 | Pancrase__   |  |                    | .12             | 0.38(0.26-0.57)                                                                                                                                                  |
|           |                                                   | 48  | 196 |              |  |                    | .26             | 0.26(0.17-0.40)                                                                                                                                                  |
|           |                                                   |     |     |              |  |                    |                 | reference dose:Q1:0.01-adjusted: cigarette smoking, pack-years, pack-years squared                                                                               |
| <b>21</b> |                                                   | 23  | 147 |              |  |                    | 0.06-0.179      | 1.31(0.60-2.85)                                                                                                                                                  |
|           |                                                   | 52  | 147 |              |  | NDMA_<br>micro/day | >0.179          | 1.86(0.87-3.95)                                                                                                                                                  |
|           |                                                   | 28  | 134 |              |  |                    | 1.06-1.60       | 1.17(0.57-2.38)                                                                                                                                                  |
|           | Rogers, MA._1995_<br>M/F_USA_Food                 | 43  | 151 | Esophagus    |  | Nitrite_<br>mg/day | >1.60           | 1.58(0.73-3.44)                                                                                                                                                  |
|           |                                                   |     |     |              |  |                    |                 | Reference dose: <1.06 - adjusted: age, gender, pack-years of cigarettes .drink alcohol. Energy intake. Ascorbic acid intake, body mass index. Level of education |
|           |                                                   | 39  | 144 |              |  | Nitrate_<br>mg/day | 134-226         | 0.71(0.38-1.33)                                                                                                                                                  |
|           |                                                   | 25  | 140 |              |  |                    | >226            | 0.44(0.24-0.93)                                                                                                                                                  |
|           |                                                   |     |     |              |  |                    |                 | Reference dose: <134 - adjusted: age, gender, pack-years of cigarettes .drink alcohol. Energy intake. Ascorbic acid intake, body mass index. Level of education  |
| <b>22</b> | Taneja,P._2017_M/F_India_Water                    | 41  | 24  | Stomach__    |  | Nitrate_<br>mg/l   | <=45            | 1(0.98-1.01)                                                                                                                                                     |
|           |                                                   | 37  | 132 |              |  |                    | >45             | 1.1(0.99-1.15)                                                                                                                                                   |
|           |                                                   |     |     |              |  |                    |                 | adjusted: age, gender, tobacco                                                                                                                                   |
| <b>23</b> |                                                   | 27  | 57  |              |  |                    | 0.02 - 0.07     | 1(0.7-2.3)                                                                                                                                                       |
|           |                                                   | 39  | 57  |              |  | Nitrite_<br>mg/day | 0.08 to <0.16   | 1.2(0.9-3.2)                                                                                                                                                     |
|           | Ward, M. H._2007_<br>M/F_maryland_Ainimal sources | 52  | 57  | Colorectal__ |  |                    | 0.16-1.23       | 1.7(0.8-3.5)                                                                                                                                                     |
|           |                                                   | 30  | 57  |              |  |                    | 0.22 to <0.89   | 1.1(0.6-2.5)                                                                                                                                                     |
|           |                                                   |     |     |              |  |                    |                 | adjusted: age, gender, calories, smoking                                                                                                                         |



|    |                                             |     |     |                       |                            |               |                  |                                                                                                                                                                                                 |
|----|---------------------------------------------|-----|-----|-----------------------|----------------------------|---------------|------------------|-------------------------------------------------------------------------------------------------------------------------------------------------------------------------------------------------|
|    |                                             | 34  | 57  |                       | Nitrate and Nitrite_mg/day | 0.89 to <1.86 | 1.3(1.0-3.9)     | reference dose:0 to<0.22- adjusted: age, gender, calories, smoking                                                                                                                              |
|    |                                             | 57  | 57  |                       |                            | 1.86-12.28    | 2(1.0-1.8)       |                                                                                                                                                                                                 |
| 24 | Ward, M. H._2008_<br>M/F_USA_Animal sources | 17  | 99  | Esophagus_A           | Nitrate and Nitrite_mg/day | 3.8-<5.7      | 0.7(0.3-1.6)     | reference dose<3.8- adjusted: year of birth, gender, body mass index, smoking, alcohol, total calories, vitamin A, folate, riboflavin, zinc, protein, carbohydrate                              |
|    |                                             | 28  | 99  | denocarcinoma         |                            | 5.7-<8.3      | 1.7(0.7-4.1)     |                                                                                                                                                                                                 |
|    |                                             | 39  | 100 | a                     |                            | 8.3+          | 2.2(0.9-5.7)     |                                                                                                                                                                                                 |
|    |                                             | 31  | 99  | Stomach_Dist          |                            | 3.8-<5.7      | 1.6(0.8-3.2)     |                                                                                                                                                                                                 |
|    |                                             | 25  | 99  | al_Adenocarci         |                            | 5.7-<8.3      | 1.8(0.8-3.8)     |                                                                                                                                                                                                 |
|    |                                             | 29  | 100 | noma                  |                            | 8.3+          | 1.6(0.7-3.7)     |                                                                                                                                                                                                 |
|    | Ward, M. H._2008_<br>M/F_USA_Plant sources  | 28  | 102 | Esophagus_A           | Nitrite_mg/day             | 0.36-<0.52    | 0.52(0.5-2.3)    | reference dose<0.36- adjusted: year of birth, gender, body mass index, smoking, alcohol, total calories, vitamin A, folate, riboflavin, zinc, protein, carbohydrate                             |
|    |                                             | 17  | 101 | denocarcinoma         |                            | 0.52-<0.67    | 0.6(0.2-1.3)     |                                                                                                                                                                                                 |
|    |                                             | 30  | 100 | a                     |                            | 0.67+         | 1(0.4-2.4)       |                                                                                                                                                                                                 |
|    |                                             | 22  | 102 | Stomach_Dist          |                            | 0.36-<0.52    | 1.1(0.4-2.7)     |                                                                                                                                                                                                 |
|    |                                             | 29  | 101 | al_Adenocarci         |                            | 0.52-<0.67    | 0.8(0.3-2.2)     |                                                                                                                                                                                                 |
|    |                                             | 30  | 100 | noma                  |                            | 0.67+         | 1.1(0.3-3.4)     |                                                                                                                                                                                                 |
|    |                                             | 27  | 99  | Esophagus_A           |                            | 16.9-<26.2    | 0.9(0.5-1.8)     |                                                                                                                                                                                                 |
|    |                                             | 18  | 99  | denocarcinoma         |                            | 16.2-<38.8    | 0.6(0.3-1.3)     |                                                                                                                                                                                                 |
|    |                                             | 24  | 100 | a                     |                            | >38.8         | 0.8(0.3-1.8)     |                                                                                                                                                                                                 |
|    |                                             | 28  | 99  | Stomach_Dist          |                            | 16.9-<26.2    | 1.2(0.6-2.5)     |                                                                                                                                                                                                 |
|    |                                             | 26  | 99  | al_Adenocarci         |                            | 26.2-<38.8    | 1.4(0.7-2.9)     |                                                                                                                                                                                                 |
|    |                                             | 26  | 100 | noma                  |                            | >38.8         | 1.6(0.7-3.6)     |                                                                                                                                                                                                 |
|    | Ward, M.<br>H._2008_M/F_USA_Water           | 12  | 55  | Stomach_              | Nitrate_mg/l               | 10            | 1(0.5-2.0)       | reference dose= 0 years- adjusted: year of birth, gender, education, smoking, alcohol                                                                                                           |
|    |                                             | 13  | 48  | distal_Adenocarcinoma |                            | 10            | 1.1(0.5-2.3)     |                                                                                                                                                                                                 |
|    |                                             | 12  | 55  | Esophagus_            |                            | >10           | 0.8(0.4-1.8)     |                                                                                                                                                                                                 |
|    |                                             | 15  | 48  | Adenocarcinoma        |                            | >10           | 0.9(0.4-1.9)     |                                                                                                                                                                                                 |
| 25 | Zhang, T._2018_<br>M/F_Food                 | 23  | 27  | Esophagus             | Nitrite_mg/day             | 3.73 -7.13    | 1.175(0.53-2.59) | reference dose: 0 - 3.7350 - adjusted: sex and age                                                                                                                                              |
|    | Zhang, T._2018_<br>M/F_Food                 | 25  | 25  | Esophagus             | Nitrite_mg/day             | 7.13-17.32    | 1.373(0.61-3.05) | reference dose: 0 - 3.7350 - adjusted: sex and age                                                                                                                                              |
|    | Zhang, T._2018_<br>M/F_Food                 | 31  | 19  | Esophagus             | Nitrite_mg/day             | 17.32-71.57   | 2.256(1.01-5.02) | reference dose: 0 - 3.7350 - adjusted: sex and age                                                                                                                                              |
| 26 | Zheng, J._2019_<br>M/F_USA_Animal sources   | 234 | 234 | Pancrease_            | NDMA_                      | .33           | 0.97(0.74-1.28)  | reference dose:Q1=0.18- adjusted: age, energy, red and processed meat intake, sex, race, education level, BMI, alcohol level, history of diabetic, smoking, family history of pancreatic cancer |
|    |                                             | 201 | 235 |                       |                            | .43           | 0.87(0.65-1.15)  |                                                                                                                                                                                                 |
|    |                                             | 272 | 234 |                       |                            | .74           | 1.17(0.89-1.54)  |                                                                                                                                                                                                 |
|    |                                             | 196 | 234 |                       | Nitrate_                   | 2.46          | 0.68(0.52-0.90)  |                                                                                                                                                                                                 |
|    |                                             | 220 | 235 |                       |                            | 3.05          | 0.74(0.56-0.97)  |                                                                                                                                                                                                 |
|    |                                             | 245 | 234 |                       |                            | 4.24          | 0.82(0.62-1.08)  |                                                                                                                                                                                                 |

|                                            |     |     |             |                   |                 |                                                                                                                                                                                                  |
|--------------------------------------------|-----|-----|-------------|-------------------|-----------------|--------------------------------------------------------------------------------------------------------------------------------------------------------------------------------------------------|
| Zheng, J. 2019_<br>M/F_USA_Food            | 121 | 234 | NDMA_       | .45               | 0.99(0.75-1.31) | diabetic, smoking, family history of pancreatic cancer                                                                                                                                           |
|                                            | 168 | 235 |             | .58               | 1.03(0.78-1.37) | reference dose:Q1=0.28- adjusted: age, energy, red and processed meat intake, sex, race, education level, BMI, alcohol level, history of diabetic, smoking, family history of pancreatic cancer  |
|                                            | 249 | 234 |             | .99               | 1.03(0.78-1.37) | reference dose:Q1=0.37- adjusted: age, energy, red and processed meat intake, sex, race, education level, BMI, alcohol level, history of diabetic, smoking, family history of pancreatic cancer  |
|                                            | 226 | 234 |             | .7                | 0.83(0.63-1.09) | reference dose:Q1=0.37- adjusted: age, energy, red and processed meat intake, sex, race, education level, BMI, alcohol level, history of diabetic, smoking, family history of pancreatic cancer  |
|                                            | 225 | 235 |             | .99               | 0.79(0.60-1.04) | reference dose:Q1=0.37- adjusted: age, energy, red and processed meat intake, sex, race, education level, BMI, alcohol level, history of diabetic, smoking, family history of pancreatic cancer  |
|                                            | 215 | 234 |             | 1.55              | 0.68(0.51-0.91) | reference dose:Q1=0.37- adjusted: age, energy, red and processed meat intake, sex, race, education level, BMI, alcohol level, history of diabetic, smoking, family history of pancreatic cancer  |
|                                            | 236 | 234 |             | 34.37             | 0.93(0.71-1.23) | reference dose:Q1=21.67- adjusted: age, energy, red and processed meat intake, sex, race, education level, BMI, alcohol level, history of diabetic, smoking, family history of pancreatic cancer |
|                                            | 192 | 235 |             | 45.54             | 0.72(0.55-0.96) | reference dose:Q1=21.67- adjusted: age, energy, red and processed meat intake, sex, race, education level, BMI, alcohol level, history of diabetic, smoking, family history of pancreatic cancer |
|                                            | 271 | 234 |             | 73.29000000000001 | 1.07(0.81-1.41) | reference dose:Q1=21.67- adjusted: age, energy, red and processed meat intake, sex, race, education level, BMI, alcohol level, history of diabetic, smoking, family history of pancreatic cancer |
|                                            | 227 | 234 |             | .06               | 1.48(1.10-1.99) | reference dose:Q1=0.04- adjusted: age, energy, red and processed meat intake, sex, race, education level, BMI, alcohol level, history of diabetic, smoking, family history of pancreatic cancer  |
|                                            | 300 | 235 |             | .08               | 1.97(1.48-2.64) | reference dose:Q1=0.04- adjusted: age, energy, red and processed meat intake, sex, race, education level, BMI, alcohol level, history of diabetic, smoking, family history of pancreatic cancer  |
|                                            | 272 | 234 |             | .12               | 1.93(1.42-2.61) | reference dose:Q1=0.04- adjusted: age, energy, red and processed meat intake, sex, race, education level, BMI, alcohol level, history of diabetic, smoking, family history of pancreatic cancer  |
|                                            | 230 | 234 |             | 31.43             | 0.95(0.72-1.25) | reference dose:Q1=18.97- adjusted: age, energy, red and processed meat intake, sex, race, education level, BMI, alcohol level, history of diabetic, smoking, family history of pancreatic cancer |
|                                            | 204 | 235 |             | 42.58             | 0.8(0.61-1.07)  | reference dose:Q1=18.97- adjusted: age, energy, red and processed meat intake, sex, race, education level, BMI, alcohol level, history of diabetic, smoking, family history of pancreatic cancer |
|                                            | 267 | 234 |             | 70.59             | 1.05(0.79-1.39) | reference dose:Q1=18.97- adjusted: age, energy, red and processed meat intake, sex, race, education level, BMI, alcohol level, history of diabetic, smoking, family history of pancreatic cancer |
|                                            | 267 | 234 |             | 70.59             | 1.05(0.79-1.39) | reference dose:Q1=18.97- adjusted: age, energy, red and processed meat intake, sex, race, education level, BMI, alcohol level, history of diabetic, smoking, family history of pancreatic cancer |
| 27<br><br>Zhu, Y. 2014_<br>M/F_Canada_Food | 335 | 502 | Colorectal_ | .07               | 1.06(0.83-1.37) | reference dose: 0.03- adjusted: age, sex, energy intake, BMI, smoking, alcohol, physical activity, education, income, NSAID, folate, supplement, province of residence                           |
|                                            | 354 | 493 |             | .2                | 1.13(0.87-1.47) |                                                                                                                                                                                                  |
|                                            | 336 | 513 |             | .77               | 1.22(0.92-1.63) |                                                                                                                                                                                                  |
|                                            | 407 | 441 |             | 2.29              | 1.42(1.03-1.96) |                                                                                                                                                                                                  |
|                                            | 138 | 510 | Colon_      | .07               | 0.96(0.72-1.28) |                                                                                                                                                                                                  |
|                                            | 123 | 488 |             | .2                | 1.08(0.79-1.46) |                                                                                                                                                                                                  |
|                                            | 132 | 519 |             | .77               | 1.11(0.80-1.67) |                                                                                                                                                                                                  |
|                                            | 129 | 446 |             | 2.29              | 1.58(0.80-1.67) |                                                                                                                                                                                                  |
|                                            | 117 | 510 | Rectum_     | .07               | 1.06(0.77-1.45) |                                                                                                                                                                                                  |
|                                            | 126 | 488 |             | .2                | 1.19(0.86-1.66) |                                                                                                                                                                                                  |
|                                            | 145 | 519 |             | .77               | 1.15(0.81-1.63) |                                                                                                                                                                                                  |
|                                            | 141 | 446 |             | 2.29              | 1.61(1.11-2.35) |                                                                                                                                                                                                  |
|                                            | 117 | 510 | Colon_      | .07               | 1.06(0.77-1.45) |                                                                                                                                                                                                  |
|                                            | 131 | 488 |             | .2                | 1.24(0.89-1.72) |                                                                                                                                                                                                  |
|                                            | 101 | 519 |             | .77               | 0.97(0.68-1.39) |                                                                                                                                                                                                  |
|                                            | 101 | 519 |             | .77               | 0.97(0.68-1.39) |                                                                                                                                                                                                  |

|  |     |     |             |                    |                    |                 |                                                                                                                                                                       |
|--|-----|-----|-------------|--------------------|--------------------|-----------------|-----------------------------------------------------------------------------------------------------------------------------------------------------------------------|
|  | 128 | 446 |             |                    | 2.29               | 1.37(0.93-2.01) |                                                                                                                                                                       |
|  | 117 | 496 |             |                    | .89                | 1.26(0.91-1.73) |                                                                                                                                                                       |
|  | 126 | 520 | Rectum_     |                    | 1.12               | 1.2(0.84-1.71)  |                                                                                                                                                                       |
|  | 145 | 474 |             |                    | 1.4                | 1.51(1.02-2.22) |                                                                                                                                                                       |
|  | 141 | 455 |             |                    | 1.92               | 1.45(0.94-2.24) |                                                                                                                                                                       |
|  | 335 | 496 |             |                    | .89                | 1.07(0.83-1.38) |                                                                                                                                                                       |
|  | 354 | 520 | Colorectal_ |                    | 1.12               | 0.99(0.75-1.30) |                                                                                                                                                                       |
|  | 336 | 479 |             |                    | 1.4                | 1.05(0.77-1.43) |                                                                                                                                                                       |
|  | 407 | 450 |             |                    | 1.92               | 1.09(0.77-1.54) |                                                                                                                                                                       |
|  | 138 | 496 |             | Nitrite_<br>mg/day | .89                | 1.15(0.86-1.54) | reference dose:0.65- adjusted: age, sex, energy intake, BMI, smoking, alcohol, physical activity, education, income, NSAID, folate, supplement, province of residence |
|  | 123 | 520 | Colon_      |                    | 1.12               | 0.91(0.66-1.26) |                                                                                                                                                                       |
|  | 132 | 474 | Proximal_   |                    | 1.4                | 0.81(0.56-1.18) |                                                                                                                                                                       |
|  | 129 | 455 |             |                    | 1.92               | 0.95(0.63-1.43) |                                                                                                                                                                       |
|  | 117 | 496 |             |                    | .89                | 0.97(0.70-1.34) |                                                                                                                                                                       |
|  | 131 | 520 | Colon_      |                    | 1.12               | 0.93(0.65-1.32) |                                                                                                                                                                       |
|  | 101 | 474 | distal_     |                    | 1.4                | 1.21(0.82-1.78) |                                                                                                                                                                       |
|  | 128 | 455 |             |                    | 1.92               | 1.32(0.85-2.04) |                                                                                                                                                                       |
|  | 335 | 477 |             |                    | 91.45              | 1.27(0.99-1.60) |                                                                                                                                                                       |
|  | 354 | 488 | Colorectal_ |                    | 124.81             | 1.19(0.93-1.52) |                                                                                                                                                                       |
|  | 336 | 481 |             |                    | 169.59             | 1.17(0.91-1.51) |                                                                                                                                                                       |
|  | 407 | 518 |             |                    | 264.14             | 0.89(0.68-1.16) |                                                                                                                                                                       |
|  | 117 | 480 | Rectum_     |                    | 91.45              | 1.12(0.83-1.53) |                                                                                                                                                                       |
|  | 126 | 489 |             |                    | 124.81             | 1.23(0.90-1.69) |                                                                                                                                                                       |
|  | 145 | 479 |             |                    | 169.59             | 1.34(0.96-1.85) |                                                                                                                                                                       |
|  | 141 | 516 |             |                    | Nitrate_<br>mg/day | 264.14          | 1.03(0.73-1.46)                                                                                                                                                       |
|  | 138 | 480 | Colon_      | 91.45              |                    | 1.25(0.93-1.66) |                                                                                                                                                                       |
|  | 123 | 489 | Proximal_   | 124.81             |                    | 0.9(0.66-1.23)  |                                                                                                                                                                       |
|  | 132 | 479 |             | 169.59             |                    | 1.06(0.78-1.46) |                                                                                                                                                                       |
|  | 129 | 516 |             | 264.14             |                    | 0.75(0.54-1.05) |                                                                                                                                                                       |
|  | 117 | 480 | Colon_      | 91.45              |                    | 1.07(0.78-1.48) |                                                                                                                                                                       |
|  | 131 | 489 | distal_     | 124.81             |                    | 1.24(0.90-1.71) |                                                                                                                                                                       |
|  | 101 | 479 |             | 169.59             |                    | 1.31(0.94-1.83) |                                                                                                                                                                       |
|  | 128 | 516 |             | 264.14             |                    | 1.01(0.71-1.45) |                                                                                                                                                                       |
