# Supplementary material for: Association of Dietary Nitrate, Nitrite, and N-Nitroso Compounds Intake and Gastrointestinal Cancers: A Systematic Review and Meta-Analysis
Source: MDPI journal article supplement (doi:10.3390/toxics11020190), 2023-02-17
Supplement: s1 [file s1]

**Supplementary Table S2**

| Table S2: Characteristics of case-control studies in the systematic review. |                                           |                        |                              |             |                        |                           |                     |                                                                          |
|-----------------------------------------------------------------------------|-------------------------------------------|------------------------|------------------------------|-------------|------------------------|---------------------------|---------------------|--------------------------------------------------------------------------|
| num                                                                         | Firstauthor_<br>Year_Gender_Locatio       | Numbe<br>r of<br>Cases | Numbe<br>rof<br>Control<br>s | Cancer type | Analytical<br>Category | Consumption<br>Categories | Adjusted OR<br>95CI | adjusted                                                                 |
| 1                                                                           | Angela Coss_2003_<br>F_USA_Animal sources | 32                     | 164                          | Pancrease__ | Nitrite_<br>mg/day     | 0.13-0.18                 | 2.4(1.2-4.7)        | reference dose<0.13- adjusted: age, cigarette use, energy                |
|                                                                             |                                           | 26                     | 147                          |             |                        | 0.19-0.26                 | 1.9(0.94-4.0)       |                                                                          |
|                                                                             |                                           | 51                     | 180                          |             |                        | >0.26                     | 3.2(1.6-6.4)        |                                                                          |
|                                                                             | Angela Coss_2003_<br>M_USA_Animal sources | 22                     | 282                          |             |                        | 0.22-0.31                 | 2.1(0.95-4.8)       | reference dose<0.22- adjusted: age, cigarette use, energy                |
|                                                                             |                                           | 60                     | 359                          |             |                        | 0.32-0.53                 | 3.8(1.8-8.0)        |                                                                          |
|                                                                             |                                           | 50                     | 342                          |             |                        | >0.53                     | 2.3(1.1-5.1)        |                                                                          |
|                                                                             | Angela Coss_2003_<br>F_USA_Food           | 32                     | 146                          |             | Nitrite_<br>mg/day     | 0.56-0.71                 | 1.8(0.94-3.4)       | reference dose<0.56- adjusted: age, cigarette use, energy                |
|                                                                             |                                           | 32                     | 168                          |             |                        | 0.72-0.93                 | 1.4(0.72-2.6)       |                                                                          |
|                                                                             |                                           | 40                     | 181                          |             | Nitrate_<br>mg/day     | >0.93                     | 1.3(0.65-2.5)       | reference dose<63- adjusted: age, cigarette use, energy                  |
|                                                                             |                                           | 33                     | 157                          |             |                        | 63-90                     | 0.99(0.58-1.7)      |                                                                          |
|                                                                             |                                           | 24                     | 158                          |             |                        | 91-126                    | 0.64(0.36-1.1)      |                                                                          |
|                                                                             |                                           | 26                     | 160                          |             | >126                   | 0.53(0.29-0.97)           |                     |                                                                          |
|                                                                             | Angela Coss_2003_<br>M_USA_Food           | 22                     | 307                          |             | Nitrite_<br>mg/day     | 0.75-0.98                 | 1(0.52-2.0)         | reference dose<0.75- adjusted: age, cigarette use, energy                |
|                                                                             |                                           | 40                     | 333                          |             |                        | 0.99-1.30                 | 1.5(0.81-2.9)       |                                                                          |
|                                                                             |                                           | 64                     | 374                          |             | Nitrate_<br>mg/day     | >1.30                     | 1.5(0.79-3.0)       | reference dose<58- adjusted: age, cigarette use, energy                  |
|                                                                             |                                           | 33                     | 311                          |             |                        | 58-82                     | 1.1(0.63-1.9)       |                                                                          |
|                                                                             |                                           | 39                     | 311                          |             |                        | 83-117                    | 1.2(0.70-2.0)       |                                                                          |
|                                                                             |                                           | 43                     | 327                          |             | >117                   | 1(0.60-1.8)               |                     |                                                                          |
| 2                                                                           | Buiatti, E._1990_<br>M/F_Italy_Food       | 203                    | 231                          | Stomach__   | Nitrate_<br>mg/day     | 81                        | 0.9(0.7-1.1)        | reference dose:53- adjusted: non-dietary variables and kilocalorie       |
|                                                                             |                                           |                        |                              |             |                        | 103                       | 0.9(0.6-1.1)        |                                                                          |
|                                                                             |                                           |                        |                              |             |                        | 130                       | 0.7(0.5-0.9)        |                                                                          |
|                                                                             |                                           |                        |                              |             | Nitrite_<br>mg/day     | 193                       | 0.9(0.7-1.2)        | reference dose:2.1- adjusted: non-dietary variables and kilocalorie      |
|                                                                             |                                           |                        |                              |             |                        | 2.8                       | 1(0.8-1.4)          |                                                                          |
|                                                                             |                                           |                        |                              |             |                        | 3.4                       | 1.2(0.9-1.7)        |                                                                          |
|                                                                             |                                           |                        |                              |             |                        | 4.1                       | 1.4(1.0-2.0)        |                                                                          |
| 3                                                                           | De Roos, A. J._2003_<br>M/F__Water        | 116                    | 380                          | Colon__     | Nitrate_<br>mg/l       | >1 to <=3                 | 1(0.8-1.3)          | reference dose<1- adjusted: the frequency-matched factors of age and sex |
|                                                                             |                                           |                        |                              |             |                        | >3 to <=5                 | 0.7(0.4-1.1)        |                                                                          |
|                                                                             |                                           |                        |                              |             |                        | >5                        | 1.2(0.8-1.7)        |                                                                          |
|                                                                             |                                           |                        |                              |             |                        | >1 to <=3                 | 0.8(0.6-1.1)        |                                                                          |
|                                                                             |                                           |                        |                              |             |                        | >3 to <=5                 | 0.7(0.5-1.2)        |                                                                          |
|                                                                             |                                           |                        |                              |             |                        | >5                        | 1.2(0.8-1.8)        |                                                                          |
| 4                                                                           | De Stefani, E._1998_<br>M/F Uruguay Food  | 340                    | 698                          | Stomach__   | NDMA_                  |                           | 1.51(1.33-1.72)     | Adjusted: age, sex, and smoking. alcohol, residence                      |

|   |                                                       |     |      |             |                    |                 |                 |                                                                                                                                                 |
|---|-------------------------------------------------------|-----|------|-------------|--------------------|-----------------|-----------------|-------------------------------------------------------------------------------------------------------------------------------------------------|
|   | De Stefani, E._1998_<br>M_Uruguay_Food                | 224 | 459  |             |                    | 1.63(1.39-1.91) |                 |                                                                                                                                                 |
|   | De Stefani, E._1998_<br>F_Uruguay_Food                | 116 | 239  |             |                    | 1.34(1.08-1.67) |                 |                                                                                                                                                 |
|   | De Stefani, E._1998_<br>F_Uruguay_Food                | 116 | 239  |             |                    | 0.79(0.62-1.01) |                 |                                                                                                                                                 |
|   | De Stefani, E._1998_<br>M_Uruguay_Food                | 224 | 459  |             | Nitrite_           | 0.52(0.43-0.62) |                 |                                                                                                                                                 |
|   | De Stefani, E._1998_<br>M/F_Uruguay_Food              | 340 | 698  |             |                    | 0.55(0.48-0.62) |                 |                                                                                                                                                 |
| 5 |                                                       | 27  |      |             | NDMA_<br>micro/day | 2.0-2.5         | 2.2(1.2-4.1)    | reference dose<=1.9- adjusted: age, gender, residence, education                                                                                |
|   |                                                       | 57  |      |             |                    | >2.6            | 2.2(1.2-4.1)    |                                                                                                                                                 |
|   | De Stefani, E._2001_<br>M/F_Uruguay_Animal sources    | 41  | 88   | Stomach__   | Nitrate_<br>mg/day | 524-784         | 1.1(0.6-1.8)    |                                                                                                                                                 |
|   |                                                       | 34  |      |             |                    | >785            | 0.9(0.5-1.6)    |                                                                                                                                                 |
|   |                                                       | 48  |      |             | Nitrite_<br>mg/day | 6.3-10.0        | 1.5(0.9-2.6)    |                                                                                                                                                 |
|   |                                                       | 43  |      |             |                    | >10.1           | 1.8(1.0-3.2)    | reference dose<6.2- adjusted: age, gender, residence, education                                                                                 |
| 6 |                                                       | 158 | 349  |             |                    | >5-10           | 1.2(0.90-1.58)  | reference dose<5- adjusted: sex, age, education, BMI, physical activity, NSAID drug , family history, intake of energy, oral contraceptives use |
|   |                                                       | 247 | 360  | Colorectal_ |                    | >10             | 1.41(1.04-1.91) |                                                                                                                                                 |
|   | Espejo-Herrera, N._<br>2016_F_spain and italy_Water   | 30  | 349  | Rectum__    |                    | >5-10           | 0.87(0.52-1.45) |                                                                                                                                                 |
|   |                                                       | 70  | 360  |             |                    | >10             | 1.49(0.89-2.48) |                                                                                                                                                 |
|   |                                                       | 122 | 349  | Colon__     |                    | >5-10           | 1.33(0.97-1.80) |                                                                                                                                                 |
|   |                                                       | 174 | 360  |             |                    | >10             | 1.46(1.04-2.05) |                                                                                                                                                 |
|   |                                                       | 289 | 454  | Colorectal_ |                    | >5-10           | 1.16(0.94-1.44) |                                                                                                                                                 |
|   |                                                       | 397 | 468  |             |                    | >10             | 1.5(1.21-1.87)  |                                                                                                                                                 |
|   | Espejo-Herrera, N._<br>2016_M_spain and italy_Water   | 80  | 454  | Rectum__    |                    | >5-10           | 0.94(0.68-1.28) |                                                                                                                                                 |
|   |                                                       | 133 | 468  |             |                    | >10             | 1.55(1.16-2.08) |                                                                                                                                                 |
|   |                                                       | 202 | 454  | Colon__     |                    | >5-10           | 1.26(0.99-1.61) |                                                                                                                                                 |
|   |                                                       | 260 | 468  |             |                    | >10             | 1.51(1.17-1.94) |                                                                                                                                                 |
|   |                                                       | 447 | 803  | Colorectal_ | Nitrate_<br>mg/day | >5-10           | 1.17(0.98-1.38) |                                                                                                                                                 |
|   |                                                       | 644 | 828  |             |                    | >10             | 1.49(1.24-1.78) |                                                                                                                                                 |
|   | Espejo-Herrera, N._<br>2016_M/F_spain and italy_Water | 110 | 803  | Rectum__    |                    | >5-10           | 0.93(0.70-1.23) |                                                                                                                                                 |
|   |                                                       | 203 | 828  |             |                    | >10             | 1.62(1.23-2.14) |                                                                                                                                                 |
|   |                                                       | 324 | 803  | Colon__     |                    | >5-10           | 1.28(1.06-1.55) |                                                                                                                                                 |
|   |                                                       | 434 | 828  |             |                    | >10             | 1.52(1.24-1.86) |                                                                                                                                                 |
|   |                                                       | 564 | 1058 | Colorectal_ |                    | 83-133          | 0.97(0.83-1.14) |                                                                                                                                                 |
|   |                                                       | 527 | 1057 |             |                    | >133            | 0.84(0.70-1.00) |                                                                                                                                                 |
|   | Espejo-Herrera, N._<br>2016_M/F_spain and italy_Food  | 394 | 1058 | Colon__     |                    | 83-133          | 1.04(0.87-1.24) |                                                                                                                                                 |
|   |                                                       | 371 | 1057 |             |                    | >133            | 0.9(0.74-1.10)  |                                                                                                                                                 |
|   |                                                       | 161 | 1058 | Rectum__    |                    | 83-133          | 0.85(0.66-1.08) |                                                                                                                                                 |
|   |                                                       | 151 | 1057 |             |                    | >133            | 0.76(0.58-1.00) |                                                                                                                                                 |
|   |                                                       | 578 | 1058 | Colorectal  |                    | 4.5-6.8         | 1.15(0.98-1.35) |                                                                                                                                                 |

|     |                                                            |     |                                              |             |                |                   |                   |                                                                                                                                                                                                                                                                                                                                                                                                                            |      |                 |                                                                                                                  |
|-----|------------------------------------------------------------|-----|----------------------------------------------|-------------|----------------|-------------------|-------------------|----------------------------------------------------------------------------------------------------------------------------------------------------------------------------------------------------------------------------------------------------------------------------------------------------------------------------------------------------------------------------------------------------------------------------|------|-----------------|------------------------------------------------------------------------------------------------------------------|
|     | Espejo-Herrera, N. 2016_M/F_spain and italy_Animal sources | 634 | 1057                                         | Rectum__    |                | >6.8              | 1.16(0.98-1.38)   | reference dose: <4.5 - adjusted: sex, age, education, physical activity, NSA drug, family history, BMI, intake energy                                                                                                                                                                                                                                                                                                      |      |                 |                                                                                                                  |
|     |                                                            | 191 | 1058                                         |             |                | 4.5-6.8           | 1.59(1.22-2.06)   |                                                                                                                                                                                                                                                                                                                                                                                                                            |      |                 |                                                                                                                  |
|     |                                                            | 204 | 1057                                         |             |                | >6.8              | 1.55(1.17-2.05)   |                                                                                                                                                                                                                                                                                                                                                                                                                            |      |                 |                                                                                                                  |
|     |                                                            | 423 | 1057                                         |             |                | >6.8              | 1.06(0.87-1.30)   |                                                                                                                                                                                                                                                                                                                                                                                                                            |      |                 |                                                                                                                  |
|     |                                                            | 378 | 1058                                         |             |                | 4.5-6.8           | 1.03(0.86-1.24)   |                                                                                                                                                                                                                                                                                                                                                                                                                            |      |                 |                                                                                                                  |
|     | Espejo-Herrera, N. 2016_M/F_spain and italy_Plant sources  | 575 | 1058                                         | Colorectal_ |                | 68-118            | 0.99(0.85-1.16)   | reference dose: <68 - adjusted: sex, age, education, physical activity, NSA drug, family history, BMI, intake energy, fiber                                                                                                                                                                                                                                                                                                |      |                 |                                                                                                                  |
|     |                                                            | 513 | 1057                                         |             |                | >118              | 0.83(0.70-0.99)   |                                                                                                                                                                                                                                                                                                                                                                                                                            |      |                 |                                                                                                                  |
|     |                                                            | 169 | 1058                                         |             |                | 68-118            | 1.04(0.71-1.16)   |                                                                                                                                                                                                                                                                                                                                                                                                                            |      |                 |                                                                                                                  |
|     |                                                            | 144 | 1057                                         |             |                | >118              | 0.9(0.57-0.99)    |                                                                                                                                                                                                                                                                                                                                                                                                                            |      |                 |                                                                                                                  |
|     |                                                            | 397 | 1058                                         |             |                | 68-118            | 1.04(0.87-1.24)   |                                                                                                                                                                                                                                                                                                                                                                                                                            |      |                 |                                                                                                                  |
|     |                                                            | 364 | 1057                                         | Colon__     | >118           | 0.89(0.73-1.08)   |                   |                                                                                                                                                                                                                                                                                                                                                                                                                            |      |                 |                                                                                                                  |
| 7   | Fathmawati_2017_M/F_Indonesia_Water                        | 3   | 4                                            | Colorectal_ | Nitrate_mg/l   | >50               | 1.405(0.14-13.67) | adjusted: protein intake, smoking history, age, family history of cancer, diabetic                                                                                                                                                                                                                                                                                                                                         |      |                 |                                                                                                                  |
|     |                                                            | 16  | 4                                            |             | >50            | 4.312(1.31-14.09) |                   |                                                                                                                                                                                                                                                                                                                                                                                                                            |      |                 |                                                                                                                  |
| 8   | Hernández-Ramírez, R. U. 2009_M/F_Mexico_Food              | 82  | 159                                          | Stomach__   | Nitrite_mg/day | >1.0-1.2          | 1.07(0.69-1.65)   | reference dose<1.0- adjusted: energy, age, gender                                                                                                                                                                                                                                                                                                                                                                          |      |                 |                                                                                                                  |
|     |                                                            | 82  | 159                                          |             | >1.2           | 1.52(0.99-2.34)   |                   |                                                                                                                                                                                                                                                                                                                                                                                                                            |      |                 |                                                                                                                  |
|     |                                                            | 76  | 156                                          |             | Nitrate_mg/day | >90.4-141.7       | 0.93(0.62-1.39)   | reference dose: <90.4- adjusted: energy, age, gender                                                                                                                                                                                                                                                                                                                                                                       |      |                 |                                                                                                                  |
|     |                                                            | 76  | 156                                          |             | >141.7         | 0.61(0.39-0.96)   |                   |                                                                                                                                                                                                                                                                                                                                                                                                                            |      |                 |                                                                                                                  |
|     |                                                            | 82  | 159                                          |             | Nitrite_mg/day | >0.2-0.4          | 0.78(0.50-1.21)   | reference dose<0.2- adjusted: energy, age, gender                                                                                                                                                                                                                                                                                                                                                                          |      |                 |                                                                                                                  |
|     |                                                            | 82  | 159                                          |             | >0.4           | 1.56(1.02-2.4)    |                   |                                                                                                                                                                                                                                                                                                                                                                                                                            |      |                 |                                                                                                                  |
|     |                                                            | 76  | 156                                          |             | Nitrate_mg/day | >1.7-3.9          | 1.28(0.82-2.0)    | reference dose: <1.7- adjusted adj: energy, age, gender                                                                                                                                                                                                                                                                                                                                                                    |      |                 |                                                                                                                  |
|     |                                                            | 76  | 156                                          |             | >3.9           | 1.92(1.23-3.02)   |                   |                                                                                                                                                                                                                                                                                                                                                                                                                            |      |                 |                                                                                                                  |
|     |                                                            | 82  | 159                                          |             | Nitrite_mg/day | >0.1-0.2          | 0.81(0.54-1.21)   | reference dose<0.1- adjusted: energy, age, gender                                                                                                                                                                                                                                                                                                                                                                          |      |                 |                                                                                                                  |
|     |                                                            | 82  | 159                                          |             | >0.2           | 0.77(0.50-1.18)   |                   |                                                                                                                                                                                                                                                                                                                                                                                                                            |      |                 |                                                                                                                  |
|     |                                                            | 76  | 156                                          |             | Nitrate_mg/day | >81.7-134.9       | 0.93(0.62-1.39)   | reference dose: <81.7- adjusted: energy, age, gender                                                                                                                                                                                                                                                                                                                                                                       |      |                 |                                                                                                                  |
|     |                                                            | 76  | 156                                          |             | >134.9         | 0.62(0.40-0.97)   |                   |                                                                                                                                                                                                                                                                                                                                                                                                                            |      |                 |                                                                                                                  |
|     |                                                            | 9   | Jakszyn, P. 2006_M/F_European countries_Food |             | 105            | 146359            | Stomach__         | NDMA_micro/day                                                                                                                                                                                                                                                                                                                                                                                                             | .09  | 0.87(0.64–1.2)  | reference dose: <0.09-adj:sex,height,weight,education,smoking,physical activity, fruits intake, energy, nitrites |
|     |                                                            |     |                                              |             | 31             | 146359            |                   |                                                                                                                                                                                                                                                                                                                                                                                                                            | .195 | 0.99(0.69–1.41) |                                                                                                                  |
| 31  | 146359                                                     |     |                                              | Stomach_    | .09            | 1.04(0.66–1.63)   |                   |                                                                                                                                                                                                                                                                                                                                                                                                                            |      |                 |                                                                                                                  |
| 52  | 146359                                                     |     |                                              | Noncardia   | .195           | 1.09(0.65–1.81)   |                   |                                                                                                                                                                                                                                                                                                                                                                                                                            |      |                 |                                                                                                                  |
| 52  | 146359                                                     |     |                                              | Stomach_    | .09            | 0.74(0.41–1.34)   |                   |                                                                                                                                                                                                                                                                                                                                                                                                                            |      |                 |                                                                                                                  |
| 105 | 146359                                                     |     |                                              | Cardia_     | .195           | 0.68(0.34–1.37)   |                   |                                                                                                                                                                                                                                                                                                                                                                                                                            |      |                 |                                                                                                                  |
| 10  | Kim, H. J. 2007_M/F_Korea_Food                             | 67  | 68                                           | Stomach__   | Nitrate_mg/day | 458               | 1.13(0.54–2.36)   | reference dose: 240- adjusted: age (<50, 50–59, 60–69, and ≥70 yr), sex, socioeconomic status (low, medium, and high status; low status indicates below elementary school in education and \$ 8500 in annual income), family history (yes and no for only first-degree relatives), refrigerator use (<20 yr and ≥20 yr), H. pylori infection, and foods (charcoal grilled beef, Korean cabbage kimchi, Dongchimi, spinach, |      |                 |                                                                                                                  |
|     |                                                            |     |                                              |             |                | 811               | 1.13(0.42–3.06)   |                                                                                                                                                                                                                                                                                                                                                                                                                            |      |                 |                                                                                                                  |
|     |                                                            | 32  | 34                                           |             |                |                   |                   |                                                                                                                                                                                                                                                                                                                                                                                                                            |      |                 |                                                                                                                  |

|    |                                           |     |     |                                     |                        |                 |                                                                                                                  |                                                                                                                                                                                                                                         |
|----|-------------------------------------------|-----|-----|-------------------------------------|------------------------|-----------------|------------------------------------------------------------------------------------------------------------------|-----------------------------------------------------------------------------------------------------------------------------------------------------------------------------------------------------------------------------------------|
|    |                                           |     |     |                                     |                        |                 | garlic, mushroom, and salty foods; low, medium, and high intake).                                                |                                                                                                                                                                                                                                         |
| 11 | La Vecchia, C. _1994_ M/F_Italy_Food      | 128 | 404 | Stomach__                           | Nitrite_ mg/day        | 2.41            | 0.98(0.72-1.33)                                                                                                  | refrence:1.91- adjusted: multiple logistic regression(age, sex, education, family history, BMI, total energy)                                                                                                                           |
|    |                                           | 126 | 405 |                                     |                        | 2.94            | 0.99(0.72-1.36)                                                                                                  |                                                                                                                                                                                                                                         |
|    |                                           | 153 | 406 |                                     |                        | 3.64            | 1.15(0.84-1.59)                                                                                                  |                                                                                                                                                                                                                                         |
|    |                                           | 193 | 404 |                                     |                        | >3.64           | 1.35(0.96-1.88)                                                                                                  |                                                                                                                                                                                                                                         |
|    |                                           | 156 | 405 | Nitrate_ mg/day                     | 80.7                   | 0.64(0.49-0.83) | reference:62.96- adjusted: multiple logistic regression (age, sex, education, family history, BMI, total energy) |                                                                                                                                                                                                                                         |
|    |                                           | 117 | 404 |                                     | 96.33                  | 0.5(0.38-0.67)  |                                                                                                                  |                                                                                                                                                                                                                                         |
|    |                                           | 117 | 406 |                                     | 116.88                 | 0.52(0.39-0.70) |                                                                                                                  |                                                                                                                                                                                                                                         |
|    |                                           | 105 | 404 |                                     | >116.88                | 0.43(0.32-0.59) |                                                                                                                  |                                                                                                                                                                                                                                         |
| 12 | La Vecchia, C. _1995_ M/F_Italy_Food      | 231 | 687 | Stomach__                           | NDMA_ micro/day        | 0.131-0.190     | 1.11(0.9-1.4)                                                                                                    | Reference dose<=0.130- adjusted: age, sex, education, family history. carotene, vitamin C, total calories, nitrite, nitrate                                                                                                             |
|    |                                           | 308 | 683 |                                     |                        | >0.191          | 0.191(1.1-1.7)                                                                                                   |                                                                                                                                                                                                                                         |
| 13 | La Vecchia, C. _1997_ M/F_Italy_Food      | 407 | 987 | Stomach__Car cinoma                 | Nitrite_ mg/day        | >=2.7           | 1.44(1.2-1.7)                                                                                                    | reference dose<2.7-adj:sex,age,education,                                                                                                                                                                                               |
| 14 | Lopez-Carrillo, L. _2004_ M/F_Mexico_Food | 60  | 146 | Stomach__                           | Nitrite_ portions/d ay | 0.12–0.26       | 0.95(0.62-1.46)                                                                                                  | reference dose=0-0.11- adjusted: age, gender, energy, socioeconomic ,education, Hp/CagA status and ascorbic acid                                                                                                                        |
|    |                                           | 83  | 148 |                                     |                        | 0.27–2.25       | 1.24(0.81-1.90)                                                                                                  |                                                                                                                                                                                                                                         |
| 15 | Mayne, S. T. _2001_ M/F_USA_Food          | 255 | 687 | Stomach_ Cardia_Adeno carcinoma     | Nitrite_ mg/day        |                 | 1.12(0.87-1.44)                                                                                                  | adjusted: sex; site (Connecticut, Washington, New Jersey); age; race (white versus other); proxy status; income; education; usual body mass index; cigarettes/day; years of consuming beer, wine, and liquor (each); and energy intake. |
|    |                                           | 352 | 687 | Stomach_Non cardia _Adenocarcin oma |                        |                 | 1.64(1.30-2.07)                                                                                                  |                                                                                                                                                                                                                                         |
|    |                                           | 206 | 687 | Esophagus__S quamous cell carcinoma |                        |                 | 1.12(0.84-1.51)                                                                                                  |                                                                                                                                                                                                                                         |
|    |                                           | 282 | 687 | Esophagus__A denocarcinom a         |                        |                 | 1.02(0.80-1.30)                                                                                                  |                                                                                                                                                                                                                                         |
|    |                                           |     |     |                                     |                        |                 |                                                                                                                  |                                                                                                                                                                                                                                         |
| 16 | McElroy, J. A. _2008_ M/F_USA_Water       | 22  | 19  | Colorectal_                         | Nitrate_ mg/l          | 0.5-1.9         | 1.39(1.02-1.89)                                                                                                  | reference dose<0.5- adjusted: age, interview period                                                                                                                                                                                     |
|    |                                           | 29  | 25  |                                     |                        | 2.5-5.9         | 1.32(0.99-1.76)                                                                                                  |                                                                                                                                                                                                                                         |
|    |                                           | 12  | 11  |                                     |                        | 6.0-9.9         | 1.28(0.88-1.88)                                                                                                  |                                                                                                                                                                                                                                         |
|    |                                           | 7   | 6   |                                     |                        | >10.0           | 1.57(0.97-2.52)                                                                                                  |                                                                                                                                                                                                                                         |
|    |                                           | 23  | 19  | Rectum__                            |                        | 0.5-1.9         | 1.29(0.73-2.31)                                                                                                  |                                                                                                                                                                                                                                         |
|    |                                           | 28  | 25  |                                     |                        | 2.5-5.9         | 1.19(0.69-2.06)                                                                                                  |                                                                                                                                                                                                                                         |
|    |                                           | 10  | 11  |                                     |                        | 6.0-9.9         | 1.11(0.52-2.36)                                                                                                  |                                                                                                                                                                                                                                         |
|    |                                           | 5   | 6   |                                     |                        | >10.0           | 1.26(0.47-3.43)                                                                                                  |                                                                                                                                                                                                                                         |
|    |                                           | 24  | 19  | Colon_ distal _                     |                        | 0.5-1.9         | 1.58(1.03-2.40)                                                                                                  |                                                                                                                                                                                                                                         |
|    |                                           | 29  | 25  |                                     |                        | 2.5-5.9         | 1.38(0.92-2.06)                                                                                                  |                                                                                                                                                                                                                                         |
|    |                                           | 12  | 11  |                                     |                        | 6.0-9.9         | 1.43(0.85-2.41)                                                                                                  |                                                                                                                                                                                                                                         |
|    |                                           |     |     |                                     |                        |                 |                                                                                                                  |                                                                                                                                                                                                                                         |

|                 |                                               |     |     |                     |                                                   |                 |                  |                                                                                                                                                        |
|-----------------|-----------------------------------------------|-----|-----|---------------------|---------------------------------------------------|-----------------|------------------|--------------------------------------------------------------------------------------------------------------------------------------------------------|
| 17              | Miller, P. E. 2013_<br>M/F_USA_Animal sources | 5   | 6   | Colon_<br>Proximal_ | Nitrate<br>and<br>Nitrite_<br>micro/100<br>0 kcal | >10.0           | 1.23(0.59-2.56)  | reference dose< 114.6 - adjusted: age, sex,<br>total energy intake, body mass index, past<br>regular NSAID use, and fruit and vegetable<br>consumption |
|                 |                                               | 20  | 19  |                     |                                                   | 0.5-1.9         | 1.35(0.81-2.26)  |                                                                                                                                                        |
|                 |                                               | 28  | 25  |                     |                                                   | 2.5-5.9         | 1.36(0.85-2.17)  |                                                                                                                                                        |
|                 |                                               | 12  | 11  |                     |                                                   | 6.0-9.9         | 1.34(0.73-2.47)  |                                                                                                                                                        |
|                 |                                               | 11  | 6   |                     |                                                   | >10.0           | 2.76(1.42-5.38)  |                                                                                                                                                        |
|                 |                                               | 177 | 207 | Colorectal_         |                                                   | 114.6-197.0     | 0.98(0.72-1.32)  |                                                                                                                                                        |
|                 |                                               | 194 | 207 |                     |                                                   | 197.1-310.2     | 1.07(0.79-1.45)  |                                                                                                                                                        |
|                 |                                               | 211 | 207 |                     |                                                   | 310.3-496.6     | 1.09(0.80-1.47)  |                                                                                                                                                        |
|                 |                                               | 225 | 207 |                     |                                                   | > 496.6         | 1.19(0.87-1.61)  |                                                                                                                                                        |
|                 |                                               | 124 | 207 |                     |                                                   | 114.6-197.0     | 1.02(0.73-1.42)  |                                                                                                                                                        |
|                 |                                               | 140 | 207 | Colon__             |                                                   | 197.1-310.2     | 1.15(0.83-1.61)  |                                                                                                                                                        |
|                 |                                               | 146 | 207 |                     |                                                   | 310.3-496.6     | 1.14(0.82-1.60)  |                                                                                                                                                        |
|                 |                                               | 157 | 207 |                     |                                                   | > 496.6         | 1.28(0.92-1.80)  |                                                                                                                                                        |
|                 |                                               | 75  | 207 |                     |                                                   | 114.6-197.0     | 1.05(0.71-1.56)  |                                                                                                                                                        |
|                 |                                               | 86  | 207 |                     |                                                   | 197.1-310.2     | 1.25(0.85-1.86)  |                                                                                                                                                        |
|                 |                                               | 76  | 207 | Colon_<br>Proximal_ |                                                   | 310.3-496.6     | 1.06(0.71-1.58)  |                                                                                                                                                        |
|                 |                                               | 102 | 207 |                     |                                                   | > 496.6         | 1.57(1.06-2.34)  |                                                                                                                                                        |
|                 |                                               | 45  | 207 |                     |                                                   | 114.6-197.0     | 0.99(0.62-1.59)  |                                                                                                                                                        |
|                 |                                               | 50  | 207 |                     |                                                   | 197.1-310.2     | 1.06(0.67-1.70)  |                                                                                                                                                        |
|                 |                                               | 64  | 207 |                     |                                                   | 310.3-496.6     | 1.28(0.81-2.01)  |                                                                                                                                                        |
|                 |                                               | 51  | 207 | Colon_<br>distal_   |                                                   | > 496.6         | 0.98(0.61-1.58)  |                                                                                                                                                        |
|                 |                                               | 52  | 207 |                     |                                                   | 114.6-197.0     | 0.95(0.61-1.48)  |                                                                                                                                                        |
|                 |                                               | 54  | 207 |                     |                                                   | 197.1-310.2     | 0.96(0.62-1.50)  |                                                                                                                                                        |
|                 |                                               | 63  | 207 |                     |                                                   | 310.3-496.6     | 1.02(0.66-1.58)  |                                                                                                                                                        |
|                 |                                               | 67  | 207 |                     |                                                   | > 496.6         | 1.04(0.67-1.62)  |                                                                                                                                                        |
| 18              | Palli, D. 2001_<br>M/F_Italy_Food             | 286 | 187 | Stomach__           | NDMA_<br>micro/day                                | .2              | 1.1(0.8-1.6)     | reference dose: 0.12- adjusted: multiple logistic<br>regressions( age, sex, social class, family<br>history, BMI, total energy)                        |
|                 |                                               | 286 | 187 |                     |                                                   | .33             | 1.1(0.8-1.5)     |                                                                                                                                                        |
|                 |                                               | 286 | 187 |                     | Nitrate_<br>mg/day                                | 93.2            | 0.7(0.5-1.0)     | reference dose: 62.6- adjusted: multiple logistic<br>regressions( age, sex, social class, family<br>history, BMI, total energy)                        |
|                 |                                               | 286 | 187 |                     |                                                   | 132.9           | 0.6(0.4-0.9)     |                                                                                                                                                        |
|                 |                                               | 286 | 187 |                     | Nitrite_<br>mg/day                                | 3.5             | 1.4(1.0-2.0)     | reverence dose: 2.5- adjusted: multiple logistic<br>regressions( age, sex, social class, family<br>history, BMI, total energy)                         |
|                 |                                               | 286 | 187 |                     |                                                   | 5.4             | 1.4(1.0-2.0)     |                                                                                                                                                        |
| 19              | Pobel, D. 1995_<br>M/F_France_Food            | 31  | 43  | Stomach__           | NDMA_<br>micro/day                                | .25             | 4.13(0.93-18.27) | reference dose:0.20- adjusted: age, sex,<br>occupation , calorie intake                                                                                |
|                 |                                               |     |     |                     |                                                   | .51             | 7(1.85-26.46)    |                                                                                                                                                        |
|                 |                                               |     |     |                     | Nitrite_<br>mg/day                                | 1.98            | 0.83(0.41-1.67)  | reverence dose:1.61- adjusted: age, sex,<br>occupation , calorie intake                                                                                |
|                 |                                               |     |     |                     |                                                   | 2.26            | 0.88(0.44-1.79)  |                                                                                                                                                        |
|                 |                                               |     |     |                     | Nitrate_<br>mg/day                                | 137.26          | 0.49(0.24-1.01)  | reverence dose:89.03- adjusted: age, sex,<br>occupation , calorie intake                                                                               |
|                 |                                               |     |     |                     |                                                   | 192.73          | 0.76(0.38-1.50)  |                                                                                                                                                        |
| Pobel, D. 1995_ |                                               |     |     | Nitrite_            | 1.98                                              | 0.74(0.37-1.48) |                  |                                                                                                                                                        |

|    |                                                  |                                        |                                              |                                                                           |                                                                        |                                                                                           |                                                                                                                        |                                                                                                                                                                                                                                                                                                                                                                                                                                                                                                                                          |
|----|--------------------------------------------------|----------------------------------------|----------------------------------------------|---------------------------------------------------------------------------|------------------------------------------------------------------------|-------------------------------------------------------------------------------------------|------------------------------------------------------------------------------------------------------------------------|------------------------------------------------------------------------------------------------------------------------------------------------------------------------------------------------------------------------------------------------------------------------------------------------------------------------------------------------------------------------------------------------------------------------------------------------------------------------------------------------------------------------------------------|
|    | M/F_France_Plant sources                         |                                        |                                              |                                                                           | mg/day                                                                 | 2.26                                                                                      | 0.77(0.38-1.57)                                                                                                        | reverence dose:1.61- adjusted: age, sex,<br>occupation , calorie intake                                                                                                                                                                                                                                                                                                                                                                                                                                                                  |
|    |                                                  |                                        |                                              |                                                                           | Nitrate_<br>mg/day                                                     | 137.26<br>192.73                                                                          | 0.52(0.26-1.07)<br>0.73(0.37-1.45)                                                                                     | reverence dose:89.03- adjusted: age, sex,<br>occupation , calorie intake                                                                                                                                                                                                                                                                                                                                                                                                                                                                 |
| 20 | Rick J.Jansen_2013_<br>M/F_USA_Animal sources    | 79<br>72<br>60<br>48                   | 197<br>197<br>196<br>196                     | Pancrase__                                                                | Nitrate_<br>mg/day                                                     | .03<br>.06<br>.12<br>.26                                                                  | 0.57(0.40-0.83)<br>0.48(0.33-0.70)<br>0.38(0.26-0.57)<br>0.26(0.17-0.40)                                               | reference dose:Q1:0.01-adjusted: cigarette<br>smoking, pack-years, pack-years squared                                                                                                                                                                                                                                                                                                                                                                                                                                                    |
| 21 | Rogers, MA._1995_<br>M/F_USA_Food                | 23<br>52<br>28<br>43<br>39<br>25       | 147<br>147<br>134<br>151<br>144<br>140       | Esophagus                                                                 | NDMA_<br>micro/day<br><br>Nitrite_<br>mg/day<br><br>Nitrate_<br>mg/day | 0.06-0.179<br>>0.179<br><br>1.06-1.60<br>>1.60<br><br>134-226<br>>226                     | 1.31(0.60-2.85)<br>1.86(0.87-3.95)<br><br>1.17(0.57-2.38)<br>1.58(0.73-3.44)<br><br>0.71(0.38-1.33)<br>0.44(0.24-0.93) | Reference dose<=0.06- adjusted: age, gender,<br>pack-years of cigarettes .drink alcohol. Energy<br>intake .ascorbic acid intake, body mass index.<br>Level of education<br><br>Reference dose: <1.06 - adjusted: age, gender,<br>pack-years of cigarettes .drink alcohol. Energy<br>intake. Ascorbic acid intake, body mass index.<br>Level of education<br><br>Reference dose: <134 - adjusted: age, gender,<br>pack-years of cigarettes .drink alcohol. Energy<br>intake. Ascorbic acid intake, body mass index.<br>Level of education |
| 22 | Taneja,P._2017_M/F_India_Wat<br>er               | 41<br>37                               | 24<br>132                                    | Stomach__                                                                 | Nitrate_<br>mg/l                                                       | <=45<br>>45                                                                               | 1(0.98-1.01)<br>1.1(0.99-1.15)                                                                                         | adjusted: age, gender, tobacco                                                                                                                                                                                                                                                                                                                                                                                                                                                                                                           |
| 23 | Ward, M. H._2007_<br>M/F_maryland_Animal sources | 27<br>39<br>52<br>30<br>34<br>57       | 57<br>57<br>57<br>57<br>57<br>57             | Colorectal_                                                               | Nitrite_<br>mg/day<br><br>Nitrate<br>and<br>Nitrite_<br>mg/day         | 0.02 - 0.07<br>0.08 to <0.16<br>0.16-1.23<br>0.22 to <0.89<br>0.89 to <1.86<br>1.86-12.28 | 1(0.7-2.3)<br>1.2(0.9-3.2)<br>1.7(0.8-3.5)<br>1.1(0.6-2.5)<br>1.3(1.0-3.9)<br>2(1.0-1.8)                               | adjusted: age, gender, calories, smoking<br><br>reference dose:0 to<0.22- adjusted: age,<br>gender, calories, smoking                                                                                                                                                                                                                                                                                                                                                                                                                    |
| 24 | Ward, M. H._2008_<br>M/F_USA_Animal sources      | 17<br>28<br>39<br>31<br>25<br>29       | 99<br>99<br>100<br>99<br>99<br>100           | Esophagus_A<br>denocarcinom<br>a<br>Stomach_Dist<br>al_Adenocarci<br>noma | Nitrate<br>and<br>Nitrite_<br>mg/day                                   | 3.8-<5.7<br>5.7-<8.3<br>8.3+<br>3.8-<5.7<br>5.7-<8.3<br>8.3+                              | 0.7(0.3-1.6)<br>1.7(0.7-4.1)<br>2.2(0.9-5.7)<br>1.6(0.8-3.2)<br>1.8(0.8-3.8)<br>1.6(0.7-3.7)                           | reference dose<3.8- adjusted: year of birth,<br>gender, body mass index, smoking, alcohol,<br>total calories, vitamin A, folate, riboflavin, zinc,<br>protein, carbohydrate                                                                                                                                                                                                                                                                                                                                                              |
|    | Ward, M. H._2008_<br>M/F_USA_Plant sources       | 28<br>17<br>30<br>22<br>29<br>30<br>27 | 102<br>101<br>100<br>102<br>101<br>100<br>99 | Esophagus_A<br>denocarcinom<br>a<br>Stomach_Dist<br>al_Adenocarci<br>noma | Nitrite_<br>mg/day                                                     | 0.36-<0.52<br>0.52-<0.67<br>0.67+<br>0.36-<0.52<br>0.52-<0.67<br>0.67+<br>16.9-<26.2      | 0.52(0.5-2.3)<br>0.6(0.2-1.3)<br>1(0.4-2.4)<br>1.1(0.4-2.7)<br>0.8(0.3-2.2)<br>1.1(0.3-3.4)<br>0.9(0.5-1.8)            | reference dose<0.36- adjusted: year of birth,<br>gender, body mass index, smoking, alcohol,<br>total calories, vitamin A ,folate, riboflavin, zinc,<br>protein, carbohydrate                                                                                                                                                                                                                                                                                                                                                             |

|    |                       |     |     |               |          |                   |                  |                                                                                                                                                                                                 |                                                                                                                                                                                                  |
|----|-----------------------|-----|-----|---------------|----------|-------------------|------------------|-------------------------------------------------------------------------------------------------------------------------------------------------------------------------------------------------|--------------------------------------------------------------------------------------------------------------------------------------------------------------------------------------------------|
|    |                       | 18  | 99  | Esophagus__A  | mg/day   | 16.2-<38.8        | 0.6(0.3-1.3)     | reference dose<16.9- adjusted: year of birth, gender, body mass index, smoking, alcohol, total calories, vitamin A, folate, riboflavin, zinc, protein, carbohydrate                             |                                                                                                                                                                                                  |
|    |                       | 24  | 100 | denocarcinom  |          | >38.8             | 0.8(0.3-1.8)     |                                                                                                                                                                                                 |                                                                                                                                                                                                  |
|    |                       | 28  | 99  | Stomach_Dist  |          | 16.9-<26.2        | 1.2(0.6-2.5)     |                                                                                                                                                                                                 |                                                                                                                                                                                                  |
|    |                       | 26  | 99  | al_Adenocarci |          | 26.2-<38.8        | 1.4(0.7-2.9)     |                                                                                                                                                                                                 |                                                                                                                                                                                                  |
|    |                       | 26  | 100 | noma          |          | >38.8             | 1.6(0.7-3.6)     |                                                                                                                                                                                                 |                                                                                                                                                                                                  |
|    | Ward, M.              | 12  | 55  | Stomach_      | Nitrate_ | 10                | 1(0.5-2.0)       | reference dose= 0 years- adjusted: year of birth, gender, education, smoking, alcohol                                                                                                           |                                                                                                                                                                                                  |
|    | H._2008_M/F_USA_Water | 13  | 48  | distal_Adenoc |          | 10                | 1.1(0.5-2.3)     |                                                                                                                                                                                                 |                                                                                                                                                                                                  |
|    |                       | 12  | 55  | arcinoma      |          | >10               | 0.8(0.4-1.8)     |                                                                                                                                                                                                 |                                                                                                                                                                                                  |
|    |                       | 15  | 48  | Esophagus__   |          | >10               | 0.9(0.4-1.9)     | reference dose<10- adjusted: year of birth, gender, body mass index, smoking, alcohol                                                                                                           |                                                                                                                                                                                                  |
| 25 | Zhang, T._2018_       | 23  | 27  | Esophagus     | Nitrite_ | 3.73 -7.13        | 1.175(0.53-2.59) | reference dose: 0 - 3.7350 - adjusted: sex and age                                                                                                                                              |                                                                                                                                                                                                  |
|    | M/F__Food             |     |     |               | mg/day   |                   |                  |                                                                                                                                                                                                 |                                                                                                                                                                                                  |
|    | Zhang, T._2018_       | 25  | 25  | Esophagus     | Nitrite_ | 7.13-17.32        | 1.373(0.61-3.05) | reference dose: 0 - 3.7350 - adjusted: sex and age                                                                                                                                              |                                                                                                                                                                                                  |
|    | M/F__Food             |     |     |               | mg/day   |                   |                  |                                                                                                                                                                                                 |                                                                                                                                                                                                  |
|    | Zhang, T._2018_       | 31  | 19  | Esophagus     | Nitrite_ | 17.32-71.57       | 2.256(1.01-5.02) | reference dose: 0 - 3.7350 - adjusted: sex and age                                                                                                                                              |                                                                                                                                                                                                  |
|    | M/F__Food             |     |     |               | mg/day   |                   |                  |                                                                                                                                                                                                 |                                                                                                                                                                                                  |
| 26 |                       | 234 | 234 |               | NDMA_    | .33               | 0.97(0.74-1.28)  | reference dose:Q1=0.18- adjusted: age, energy, red and processed meet intake, sex, race, education level, BMI, alcohol level, history of diabetic, smoking, family history of pancreatic cancer |                                                                                                                                                                                                  |
|    |                       | 201 | 235 |               |          | .43               | 0.87(0.65-1.15)  |                                                                                                                                                                                                 |                                                                                                                                                                                                  |
|    |                       | 272 | 234 |               |          | .74               | 1.17(0.89-1.54)  |                                                                                                                                                                                                 |                                                                                                                                                                                                  |
|    |                       | 196 | 234 |               |          | 2.46              | 0.68(0.52-0.90)  |                                                                                                                                                                                                 |                                                                                                                                                                                                  |
|    |                       | 220 | 235 |               |          | 3.05              | 0.74(0.56-0.97)  |                                                                                                                                                                                                 |                                                                                                                                                                                                  |
|    |                       | 245 | 234 |               | Nitrate_ | 4.24              | 0.82(0.62-1.08)  | reference dose:Q1=1.63- adjusted: age, energy, red and processed meet intake, sex, race, education level, BMI, alcohol level, history of diabetic, smoking, family history of pancreatic cancer |                                                                                                                                                                                                  |
|    |                       | 121 | 234 |               |          | .45               | 0.99(0.75-1.31)  |                                                                                                                                                                                                 |                                                                                                                                                                                                  |
|    |                       | 168 | 235 |               |          | .58               | 1.03(0.78-1.37)  |                                                                                                                                                                                                 |                                                                                                                                                                                                  |
|    |                       | 249 | 234 |               |          | .99               | 1.03(0.78-1.37)  |                                                                                                                                                                                                 |                                                                                                                                                                                                  |
|    |                       | 226 | 234 |               |          | .7                | 0.83(0.63-1.09)  |                                                                                                                                                                                                 |                                                                                                                                                                                                  |
|    |                       | 225 | 235 |               | Nitrite_ | .99               | 0.79(0.60-1.04)  | reference dose:Q1=0.37- adjusted: age, energy, red and processed meet intake, sex, race, education level, BMI, alcohol level, history of diabetic, smoking, family history of pancreatic cancer |                                                                                                                                                                                                  |
|    |                       | 215 | 234 |               |          | 1.55              | 0.68(0.51-0.91)  |                                                                                                                                                                                                 |                                                                                                                                                                                                  |
|    |                       | 236 | 234 |               |          | 34.37             | 0.93(0.71-1.23)  |                                                                                                                                                                                                 |                                                                                                                                                                                                  |
|    |                       | 192 | 235 |               |          | 45.54             | 0.72(0.55-0.96)  |                                                                                                                                                                                                 |                                                                                                                                                                                                  |
|    |                       | 271 | 234 |               |          | 73.29000000000001 | 1.07(0.81-1.41)  |                                                                                                                                                                                                 |                                                                                                                                                                                                  |
|    |                       |     |     |               |          |                   |                  |                                                                                                                                                                                                 | reference dose:Q1=21.67- adjusted: age, energy, red and processed meet intake, sex, race, education level, BMI, alcohol level, history of diabetic, smoking, family history of pancreatic cancer |

[illegible]



|  |     |     |             |                    |        |                 |                                                                                                                                                                                     |
|--|-----|-----|-------------|--------------------|--------|-----------------|-------------------------------------------------------------------------------------------------------------------------------------------------------------------------------------|
|  | 128 | 455 |             |                    | 1.92   | 1.32(0.85-2.04) |                                                                                                                                                                                     |
|  | 335 | 477 |             |                    | 91.45  | 1.27(0.99-1.60) |                                                                                                                                                                                     |
|  | 354 | 488 | Colorectal_ |                    | 124.81 | 1.19(0.93-1.52) |                                                                                                                                                                                     |
|  | 336 | 481 |             |                    | 169.59 | 1.17(0.91-1.51) |                                                                                                                                                                                     |
|  | 407 | 518 |             |                    | 264.14 | 0.89(0.68-1.16) |                                                                                                                                                                                     |
|  | 117 | 480 | Rectum_     |                    | 91.45  | 1.12(0.83-1.53) |                                                                                                                                                                                     |
|  | 126 | 489 |             |                    | 124.81 | 1.23(0.90-1.69) |                                                                                                                                                                                     |
|  | 145 | 479 |             |                    | 169.59 | 1.34(0.96-1.85) |                                                                                                                                                                                     |
|  | 141 | 516 |             | Nitrate_<br>mg/day | 264.14 | 1.03(0.73-1.46) | reference dose: 56.94- adjusted: age, sex,<br>energy intake, BMI, smoking, alcohol, physical<br>activity, education,<br>income, NSAID, folate, supplement, province of<br>residence |
|  | 138 | 480 | Colon_      |                    | 91.45  | 1.25(0.93-1.66) |                                                                                                                                                                                     |
|  | 123 | 489 | Proximal_   |                    | 124.81 | 0.9(0.66-1.23)  |                                                                                                                                                                                     |
|  | 132 | 479 |             |                    | 169.59 | 1.06(0.78-1.46) |                                                                                                                                                                                     |
|  | 129 | 516 |             |                    | 264.14 | 0.75(0.54-1.05) |                                                                                                                                                                                     |
|  | 117 | 480 | Colon_      |                    | 91.45  | 1.07(0.78-1.48) |                                                                                                                                                                                     |
|  | 131 | 489 | distal_     |                    | 124.81 | 1.24(0.90-1.71) |                                                                                                                                                                                     |
|  | 101 | 479 |             |                    | 169.59 | 1.31(0.94-1.83) |                                                                                                                                                                                     |
|  | 128 | 516 |             |                    | 264.14 | 1.01(0.71-1.45) |                                                                                                                                                                                     |
